# Supplementary material for: Seeking effective interventions to treat complex wounds: an overview of systematic reviews
Source: PubMed Central journal article supplement (PMC4406332; doi:10.1186/s12916-015-0288-5), 2015-04-22
Supplement: 12916_2015_288_MOESM2_ESM.pdf [file 12916_2015_288_MOESM2_ESM.pdf]

## **MEDLINE search strategy**

1. Pressure Ulcer/
2. (pressureadj ulcer\$.tw.
3. (pressureadj sore\$.tw.
4. (decubitusadj ulcer\$.tw.
5. (decubitusadj sore\$.tw.
6. (bedadj ulcer\$.tw.
7. (bedadj sore\$.tw.
8. Surgical Wound Infection/
9. Surgical Wound Dehiscence/
10. (surg\$ adj2 wound\$.tw.
11. (surg\$ adj infect\$.tw.
12. (surg\$ adj2 dehiscence).tw.
13. (arterial adj2 ulcer\$.tw.
14. (ischemicadj ulcer\$.tw.
15. (neuropathicadj ulcer\$.tw.
16. (vascul\$ adj ulcer\$.tw.
17. Varicose Ulcer/
18. (varicoseadj ulcer\$.tw.
19. (venous adj2 ulcer\$.tw.
20. (stasisadj ulcer\$.tw.
21. Skin Ulcer/
22. exp Foot Ulcer/
23. (footadj ulcer\$.tw.
24. Leg Ulcer/
25. (legadj ulcer\$.tw.
26. (diabeticadj foot).tw.
27. (diabeticadj feet).tw.
28. (cruraladj ulcer\$.tw.
29. (ulcusadjcruris).tw.
30. (chronicadj wound\$.tw.
31. (chronicadj sore\$.tw.
32. (chronicadj ulcer\$.tw.
33. or/1-32
34. exp Adult/
35. adult.mp.
36. Middle Aged/
37. age\$.tw.
38. or/34-37
39. meta analysis.mp,pt.
40. review.pt.
41. search\$.tw.
42. or/39-41 (1912330)
43. 42 or 46
44. 33 and 38 and 43
45. exp Animals/ not (exp Animals/ and Humans/)
46. 44 not 45
