# Supplementary material for: Seeking effective interventions to treat complex wounds: an overview of systematic reviews
Source: PubMed Central journal article supplement (PMC4406332; doi:10.1186/s12916-015-0288-5), 2015-04-22
Supplement: 12916_2015_288_MOESM3_ESM.pdf [file 12916_2015_288_MOESM3_ESM.pdf]

| <b>Systematic Review Characteristics</b> |                           |                    |                         |                                           |                             |                                             |                                                                                                        |                     |                                  |                                  |
|------------------------------------------|---------------------------|--------------------|-------------------------|-------------------------------------------|-----------------------------|---------------------------------------------|--------------------------------------------------------------------------------------------------------|---------------------|----------------------------------|----------------------------------|
| <b>Study</b>                             | <b>Country of conduct</b> | <b>No. studies</b> | <b>RCT Study design</b> | <b>Wound type(s)</b>                      | <b>Age category (years)</b> | <b>Patient Population</b>                   | <b>Comorbidities</b>                                                                                   | <b>Care setting</b> | <b>Range of treatment period</b> | <b>Range of follow up period</b> |
| Dat, 2012[68]                            | Australia                 | 2                  | Yes                     | Pressure ulcers, infected surgical wounds | Any age                     | NR                                          | NR                                                                                                     | Hospital, clinic    | Daily-10 weeks                   | <12 weeks                        |
| Dumville, 2012a[17]                      | UK                        | 4                  | Yes                     | Diabetic foot/leg ulcers                  | 18-80                       | Type I & II diabetics                       | NR                                                                                                     | NR                  | Daily-24 weeks                   | 8-35.7 weeks                     |
| Dumville, 2012b[18]                      | UK                        | 6                  | Yes                     | Diabetic foot/leg ulcers                  | Adults                      | Type I & II diabetics                       | NR                                                                                                     | NR                  | NR                               | 4-12 weeks                       |
| Edwards, 2012[19]                        | UK                        | 6                  | Yes                     | Diabetic foot/leg ulcers                  | NR                          | Type I & II diabetics                       | NR                                                                                                     | Out-patients        | NR                               | <16 weeks                        |
| Hinchliffe, 2012[69]                     | UK                        | 49                 | No                      | Diabetic foot/leg ulcers                  | 36-74                       | Type I & II diabetics                       | Cardiovascular, renal and cerebral vascular diseases                                                   | Hospital            | NR                               | 30 days-7 years                  |
| Kranke, 2012[20]                         | Germany                   | 9                  | Yes                     | Diabetic foot/leg ulcers                  | NR                          | Type I & II diabetics, venous insufficiency | NR                                                                                                     | NR                  | 10 days-10 weeks                 | NR                               |
| Martinez-Zapata, 2012[21]                | Spain                     | 9                  | Yes                     | Mixed chronic wounds, venous leg ulcers   | NR                          | NR                                          | NR                                                                                                     | Hospital            | 8-40 weeks                       | NR                               |
| Peters, 2012[70]                         | Netherlands               | 33                 | Yes                     | Diabetic foot/leg ulcers                  | ≥18                         | Type I & II diabetics                       | Diabetes, skin and soft tissue infection, foot ulcers, post-surgical wounds, osteomyelitis, cellulitis | NR                  | 5 days-9.7 weeks                 | NR                               |
| Vermeulen, 2012[71]<br>(CR: Vermeulen,   | Netherlands               | 13                 | Yes                     | Infected surgical wounds                  | >18                         | NR                                          | NR                                                                                                     | All settings        | NR                               | NR                               |

|                                                                                        |          |    |     |                                                                        |          |                                                                              |                                                   |                                                                          |                      |                        |
|----------------------------------------------------------------------------------------|----------|----|-----|------------------------------------------------------------------------|----------|------------------------------------------------------------------------------|---------------------------------------------------|--------------------------------------------------------------------------|----------------------|------------------------|
| 2005[113],<br>Vermeulen,<br>2004[114])                                                 |          |    |     |                                                                        |          |                                                                              |                                                   |                                                                          |                      |                        |
| Voigt,<br>2012[22]                                                                     | USA      | 10 | Yes | Diabetic<br>foot/leg ulcers                                            | 20-70    | NR                                                                           | Diabetic,<br>cancer                               | NR                                                                       | 2-13 weeks           | 4 weeks-<br>78 weeks   |
| Wilkinson,<br>2012[23]<br>(CR:<br>Wilkinson,<br>1999[115],<br>Wilkinson,<br>1998[116]) | UK       | 6  | Yes | Venous leg<br>ulcers                                                   | NR       | Patients with<br>venous or<br>arterial leg<br>ulcers for at<br>least 4 weeks | Diabetes,<br>venous<br>insufficiency              | Dermatology<br>ward, surgical<br>department,<br>surgical out-<br>patient | 13-43<br>weeks       | 4-<br>60.1 weeks       |
| Zarchi,<br>2012[72]                                                                    | Denmark  | 7  | Yes | Venous leg<br>ulcers                                                   | NR       | NR                                                                           | Diabetes,<br>venous<br>insufficiency,<br>surgical | NR                                                                       | NR                   | 10 days -<br>12 months |
| Aziz,<br>2011[73]<br>(CR: Aziz,<br>2010[117])                                          | Malaysia | 3  | Yes | Venous leg<br>ulcers                                                   | All ages | NR                                                                           | NR                                                | NR                                                                       | 8-12 weeks           | 8-12<br>weeks          |
| Cruciani,<br>2011[24]                                                                  | Italy    | 5  | Yes | Diabetic<br>foot/leg ulcers,<br>mixed<br>arterial/venous<br>leg ulcers | 30-86    | Type I & II<br>diabetics                                                     | Osteomyelitis,<br>cellulitis                      | Hospital                                                                 | 1-21 days            | 5 days-26<br>weeks     |
| Cullum,<br>2011[25]                                                                    | UK       | 8  | Yes | Venous leg<br>ulcers                                                   | NR       | NR                                                                           | Elderly                                           | Hospital                                                                 | Daily-12<br>weeks    | 3-12<br>weeks          |
| Damiani,<br>2011[26]                                                                   | Italy    | 6  | No  | Infected<br>surgical<br>wounds                                         | NR       | Post-<br>sternotomy<br>osteomyelitis                                         | NR                                                | Hospital                                                                 | NR                   | NR                     |
| Dumville,<br>2011a[27]                                                                 | UK       | 6  | Yes | Diabetic<br>foot/leg ulcers                                            | 18-80    | Type I & II<br>diabetics                                                     | NR                                                | NR                                                                       | Daily-16<br>weeks    | < 16<br>weeks          |
| Dumville,<br>2011b[28]                                                                 | UK       | 5  | Yes | Diabetic<br>foot/leg ulcers                                            | NR       | Type I & II<br>diabetics                                                     | NR                                                | NR                                                                       | 0.5 days-20<br>weeks | 10 days-<br>16 weeks   |
| Hu,<br>2011[29]                                                                        | China    | 31 | Yes | Venous leg<br>ulcers                                                   | 28-70    | Adults with a<br>variety of<br>wounds to<br>pressure<br>ulcers,<br>venous    | NR                                                | NR                                                                       | Daily-5<br>weeks     | NR                     |

|                                                    |                |     |     |                             |                         |                                                                      |                                                                                                                      |                                                                                      |                     |                |           |
|----------------------------------------------------|----------------|-----|-----|-----------------------------|-------------------------|----------------------------------------------------------------------|----------------------------------------------------------------------------------------------------------------------|--------------------------------------------------------------------------------------|---------------------|----------------|-----------|
|                                                    |                |     |     |                             |                         | ulcers,<br>diabetic<br>ulcers and<br>other disease<br>related ulcers |                                                                                                                      |                                                                                      |                     |                |           |
| Hunt,<br>2011[79]<br>(CR: Hunt,<br>2009[120])      | Canada         | 36  | Yes | Diabetic<br>foot/leg ulcers | NR                      | Type I & II<br>diabetics                                             | NR                                                                                                                   | NR                                                                                   | NR                  | NR             | NR        |
| Jull,<br>2011[30]<br>(CR: Jull,<br>2007[118])      | New<br>Zealand | 12  | Yes | Venous leg<br>ulcers        | Any age                 | NR                                                                   | NR                                                                                                                   | Any care setting                                                                     | 7 days-26<br>weeks  | NR             | NR        |
| Lima,<br>2011[74]                                  | Brazil         | 8   | No  | Diabetic<br>foot/leg ulcers | NR                      | Type I & II<br>diabetics                                             | NR                                                                                                                   | NR                                                                                   | NR                  | NR             | NR        |
| McGinnis,<br>2011[75]                              | UK             | 1   | Yes | Pressure ulcers             | Average<br>84           |                                                                      | Dementia,<br>neurological<br>disabilities,<br>cardiovascular<br>disease,<br>malignancy or<br>orthopaedic<br>problems | Hospital                                                                             | 78 weeks            | NR             | NR        |
| McInnes,<br>2011[76]                               | Australia      | 18  | Yes | Pressure ulcers             | Adults                  | Inpatient                                                            | NSD                                                                                                                  | Nursing homes,<br>care of the elderly,<br>medical or<br>surgical wards.              | NR                  | NR             | NR        |
| Nelson,<br>2011a[77]<br>(CR: Nelson,<br>2008[119]) | UK             | 101 | Yes | Venous leg<br>ulcers        | NR                      | NR                                                                   | NR                                                                                                                   | NR                                                                                   | NR                  | NR             | NR        |
| Nelson,<br>2011b[31]                               | UK             | 7   | Yes | Venous leg<br>ulcers        | NR                      | NR                                                                   | NR                                                                                                                   | Community/home<br>care setting as<br>well as outpatient<br>and inpatient<br>settings | 2028 hours<br>/week | 13-26<br>weeks | NR        |
| Reddy,<br>2011[78]                                 | USA            | 15  | Yes | Pressure ulcers             | >18 or not<br>discussed | NR                                                                   | NR                                                                                                                   | NR                                                                                   | NR                  | NR             | NR        |
| Suissa,<br>2011[32]                                | Canada         | 10  | Yes | Mixed chronic<br>wounds     | NR                      | NR                                                                   | NR                                                                                                                   | NR                                                                                   | NR                  | NR             | 2-6 weeks |

|                                               |             |    |     |                                                            |                    |                       |                                                                                       |                                                        |                  |                  |
|-----------------------------------------------|-------------|----|-----|------------------------------------------------------------|--------------------|-----------------------|---------------------------------------------------------------------------------------|--------------------------------------------------------|------------------|------------------|
| Voigt, 2011[33]                               | USA         | 8  | Yes | Diabetic foot/leg ulcers                                   | NR                 | NR                    | Diabetes, Neuropathic insufficiency, venous insufficiency, arterial occlusive disease | NR                                                     | NR               | 5-24 weeks       |
| Carter, 2010[34]                              | USA         | 10 | Yes | Mixed arterial/venous leg ulcers, venous leg ulcers        | NR                 | NR                    | NR                                                                                    | NR                                                     | NR               | NR               |
| Chen, 2010[35]                                | China       | 6  | Yes | Diabetic foot/leg ulcers, mixed arterial/venous leg ulcers | NR                 | Type I & II diabetics | NR                                                                                    | NR                                                     | 3 to 24 weeks    | NR               |
| O'Meara, 2010[36]<br>(CR: O'Meara, 2009[121]) | UK          | 25 | Yes | Venous leg ulcers                                          | NR                 | NR                    | NR                                                                                    | Any setting: inpatient, outpatient, nursing home, etc. | 10 days-24 weeks | 10 days-24 weeks |
| Pan, 2010[37]                                 | Italy       | 10 | No  | Infected surgical wounds                                   | ≥13                | NR                    | NR                                                                                    | Hospital                                               | 2 days-1 week    | NR               |
| Vermeulen, 2010[80]                           | Netherlands | 3  | Yes | Mixed arterial/venous leg ulcers                           | > 18               | NR                    | NR                                                                                    | All settings                                           | NR               | 4 weeks          |
| Villela, 2010[38]                             | Brazil      | 18 | Yes | Diabetic foot/leg ulcers                                   | NR                 | Type I & II diabetics | NR                                                                                    | NR                                                     | NR               | NR               |
| Xie, 2010[81]                                 | Canada      | 10 | Yes | Diabetic foot/leg ulcers                                   | 37-74              | NR                    | Diabetics, venous insufficiency, surgical                                             | NR                                                     | NR               | 3-28 weeks       |
| Amsler, 2009[39]                              | Switzerland | 8  | Yes | Venous leg ulcers                                          | Mean overall: 60.7 | NR                    | NR                                                                                    | Single and multi-centers, NR                           | NR               | 12-78 weeks      |
| Jull, 2009[40]                                | New Zealand | 2  | Yes | Venous leg ulcers                                          | Any age            | NR                    | NR                                                                                    | Community setting, outpatient                          | <12 weeks        | NR               |

|                                                             |         |     |     |                                  |                               |                                                                                                  |                                                                                           |                                  |             |                                    |
|-------------------------------------------------------------|---------|-----|-----|----------------------------------|-------------------------------|--------------------------------------------------------------------------------------------------|-------------------------------------------------------------------------------------------|----------------------------------|-------------|------------------------------------|
|                                                             |         |     |     |                                  |                               |                                                                                                  |                                                                                           | clinics, hospitals               |             |                                    |
| Lo, 2009[41]                                                | Taiwan  | 8   | Yes | Mixed chronic wounds             | 58.9-74.9                     | NR                                                                                               | NR                                                                                        | Western healthcare environments. | 4-8 weeks   | NR                                 |
| Martinez-Zapata, 2009[42] (CR to Martinez-Zapata, 2012[21]) | Spain   | 20  | Yes | Mixed chronic wounds             | Adults                        | NR                                                                                               | NR                                                                                        | NR                               | NR          | NR                                 |
| McGaughey, 2009[82]                                         | Ireland | 11  | Yes | Mixed arterial/venous leg ulcers | NR                            | NR                                                                                               | NR                                                                                        | NR                               | NR          | NR                                 |
| Ministry of Health and Long-term Care, 2009a[43]            | Canada  | 108 | Yes | Pressure ulcers                  | 47-88                         | Immobile, bedridden,                                                                             | NR                                                                                        | Any care setting                 | <78.2 weeks | 10 months                          |
| Ministry of Health and Long-term Care, 2009b[83]            | Canada  | 2   | Yes | Mixed arterial/venous leg ulcers | Mean age between 73-83        | Persons newly referred to homecare for leg ulcer management; persons with leg or pressure wounds | NR                                                                                        | Home care                        | NR          | 13-26 weeks or until wounds healed |
| Nelson, 2009[84] (CR: Nelson, 2006[122])                    | UK      | 1   | Yes | Mixed arterial/venous leg ulcers | NR                            | NR                                                                                               | NR                                                                                        | NR                               | NR          | NR                                 |
| O'Meara, 2009a[44]                                          | UK      | 7   | Yes | Venous leg ulcers                | Mean overall (SD): 69.9(13.5) | NR                                                                                               | Presence of: slough, granulation, epithelialising tissue; history of deep vein thrombosis | NR                               | NR          | 13-52 weeks                        |

|                                            |           |    |     |                                                     |                                       |                                                                                                |    |                                                                                               |                                    |                                  |
|--------------------------------------------|-----------|----|-----|-----------------------------------------------------|---------------------------------------|------------------------------------------------------------------------------------------------|----|-----------------------------------------------------------------------------------------------|------------------------------------|----------------------------------|
| O'Meara, 2009b[45]                         | UK        | 39 | Yes | Mixed arterial/venous leg ulcers, venous leg ulcers | 18-97                                 | NR                                                                                             | NR | NR                                                                                            | NR                                 | NR                               |
| Ramundo, 2009[85] (CR: Ramundo, 2008[123]) | USA       | 12 | Yes | Pressure ulcers                                     | Adults (8 studies), elderly (1 study) | NR                                                                                             | NR | NR                                                                                            | NR                                 | NR                               |
| Roukis, 2009[86]                           | USA       | 2  | No  | Diabetic foot/leg ulcers                            | 37-81                                 | Type I & II diabetics                                                                          | NR | Hospital (surgical)                                                                           | NR                                 | 12-256 weeks                     |
| Barber, 2008[46]                           | Australia | 24 | Yes | Diabetic foot/leg ulcers, venous leg ulcers         | NR                                    | NR                                                                                             | NR | NR                                                                                            | NR                                 | 6-26 weeks                       |
| Blozik, 2008[47]                           | Germany   | 5  | Yes | Diabetic foot/leg ulcers                            | Any age                               | Type I & II diabetics                                                                          | NR | Any setting                                                                                   | NR                                 | NR                               |
| Flemming, 2008[48]                         | UK        | 4  | Yes | Venous leg ulcers                                   | Any age                               | Patients described as having (chronic) venous leg ulcers ("resistant to conventional therapy") | NR | Any care setting                                                                              | 10 minutes to 1x/week for 39 weeks | NR                               |
| Heyneman, 2008[87]                         | Belgium   | 29 | Yes | Pressure ulcers                                     | NR                                    | NR                                                                                             | NR | Inpatient hospitals, home care services, nursing homes, wound clinics, rehabilitation clinics | 4.2-16 weeks                       | Median study length 8 weeks      |
| Hinchliffe, 2008[88]                       | UK        | 60 | Yes | Diabetic foot/leg ulcers                            | ≥18                                   | Type I & II diabetics                                                                          | NR | NR                                                                                            | Daily-12 weeks                     | 4-26 weeks                       |
| Howard, 2008[89]                           | UK        | 54 | Yes | Venous leg ulcers                                   | NR                                    | NR                                                                                             | NR | NR                                                                                            | NR                                 | 28.3-208.7 weeks (only for RCTs) |

|                                      |             |     |     |                                  |          |                                                   |                                 |                                                                                      |                |                  |
|--------------------------------------|-------------|-----|-----|----------------------------------|----------|---------------------------------------------------|---------------------------------|--------------------------------------------------------------------------------------|----------------|------------------|
| Langer, 2008[90]                     | Germany     | 4   | Yes | Pressure ulcers                  | NR       | NR                                                | NR                              | Institution, hospital, nursing home                                                  | 4 -12 weeks    | NR               |
| Lo, 2008[91]                         | Taiwan      | 14  | Yes | Venous leg ulcers                | 18-99    | NR                                                | NR                              | NR                                                                                   | 9 days-8 weeks | NR               |
| Moore, 2008[92]                      | Ireland     | 3   | Yes | Pressure ulcers                  | All ages | NR                                                | NR                              | NR                                                                                   | NR             | NR               |
| Noble-Bell, 2008[93]                 | UK          | 4   | Yes | Diabetic foot/leg ulcers         | NR       | Type I & II diabetics                             | NR                              | NR                                                                                   | 2-16 weeks     | NR               |
| Reddy, 2008[94]                      | USA         | 103 | Yes | Pressure ulcers                  | >18      | NR                                                | NR                              | Mixed settings, long term care, rehab, ambulatory, home care, palliative, acute care | 1-104 weeks    | NR               |
| Sadat, 2008[49]                      | UK          | 3   | Yes | Mixed arterial/venous leg ulcers | NR       | Type I & II diabetics, vascular lower limb wounds | Diabetes                        | NR                                                                                   | NR             | NR               |
| Ubbink, 2008a[95]                    | Netherlands | 7   | Yes | Diabetic foot/leg ulcers         | ~40-60   | NR                                                | Diabetic, venous insufficiency, | All settings                                                                         | NR             | 2-52 weeks       |
| Ubbink, 2008b[96]                    | Netherlands | 13  | Yes | Infected surgical wounds         | NR       | NR                                                | Diabetics                       | All settings                                                                         | NR             | NR               |
| Van den Boogaard, 2008[97]           | Netherlands | 5   | Yes | Pressure ulcers                  | NR       | NR                                                | NR                              | NR                                                                                   | NR             | 4-6 weeks        |
| Chambers, 2007[50]                   | UK          | 9   | Yes | Mixed arterial/venous leg ulcers | NR       | NR                                                | NR                              | NR                                                                                   | NR             | 4 to 12 weeks    |
| Jones, 2007[51]                      | UK          | 9   | Yes | Venous leg ulcers                | Any age  | Leg ulcers                                        | NR                              |                                                                                      | NR             | 20 days-52 weeks |
| Palfreyman, 2007[52]                 | UK          | 42  | Yes | Venous leg ulcers                | NR       | NR                                                | NR                              | NR                                                                                   | 4-40 weeks     | NR               |
| Nelson, 2006[98]<br>(CR:<br>O'Meara, | UK          | 23  | Yes | Diabetic foot/leg ulcers         | NSD      | Type I & II diabetics                             | NR                              | Inpatients and outpatients.                                                          | NR             | NR               |

|                           |         |    |     |                                                                           |             |                                                                           |                                            |                                                 |                      |                  |
|---------------------------|---------|----|-----|---------------------------------------------------------------------------|-------------|---------------------------------------------------------------------------|--------------------------------------------|-------------------------------------------------|----------------------|------------------|
| 2000[124])                |         |    |     |                                                                           |             |                                                                           |                                            |                                                 |                      |                  |
| O'Donnell, 2006[53]       | USA     | 20 | Yes | Venous leg ulcers                                                         | 50-80       | NR                                                                        | NR                                         | NR                                              | NR                   | NR               |
| Sari, 2006[54]            | Iran    | 3  | Yes | Pressure ulcers                                                           | All ages    | NR                                                                        | NR                                         | Nursing home in one study                       | 3-5 times/week       | Unclear          |
| Bouza, 2005a[99]          | Spain   | 21 | Yes | Pressure ulcers                                                           | NR          | NR                                                                        | NR                                         | NR                                              | NR                   | NR               |
| Bouza, 2005b[55]          | Spain   | 31 | Yes | Mixed chronic wounds, mixed arterial/venous leg ulcers, venous leg ulcers | NR          | Ambulatory patients                                                       | NR                                         | NR                                              | 6 weeks-160.9 months | NR               |
| Coleridge-Smith, 2005[56] | UK      | 5  | Yes | Mixed arterial/venous leg ulcers, venous leg ulcers                       | Adults      | Chronic venous disease                                                    | Post-thrombotic syndrome, varicose veins   | NR                                              | NR                   | 2.5-26 weeks     |
| Cruciani, 2005[57]        | Italy   | 5  | Yes | Mixed arterial/venous leg ulcers, diabetic foot/leg ulcers                | NR          | Type I & II diabetics                                                     | NR                                         | NR                                              | 3-21 days            | NR               |
| Ho, 2005[58]              | Canada  | 23 | Yes | Diabetic foot/leg ulcers, mixed chronic wounds, venous leg ulcers         | 51-88       | Older adults with foot ulcers that are diabetic, venous or both in origin | NR                                         | Hospital                                        | 6-24 weeks           | NR               |
| Roeckl-Wiedmann, 2005[59] | Germany | 6  | Yes | Diabetic foot/leg ulcers                                                  | NR          | Type I & II diabetics                                                     | NR                                         | NR                                              | NR                   | NR               |
| Schuren, 2005[100]        | Canada  | 9  | Yes | Venous leg ulcers                                                         | NR          | NR                                                                        | NR                                         | NR                                              | NR                   | NR               |
| Stratton, 2005[16]        | UK      | 15 | Yes | Pressure ulcers                                                           | >18 (40-90) | NR                                                                        | Diabetes, dementia,                        | Hospital and community                          | 2-74 weeks           | NR               |
| Cullum, 2004[60]          | UK      | 8  | Yes | Pressure ulcers                                                           | 16-98       | Impaired mobility, elderly, surgical                                      | Fixed joints, peripheral vascular disease, | Hospital, long term care facility, nursing home | NR                   | 13 days-36 weeks |



|                                                                    |           |    |     |                                        |       |                                                            |                                          |                                                                         |            |                    |
|--------------------------------------------------------------------|-----------|----|-----|----------------------------------------|-------|------------------------------------------------------------|------------------------------------------|-------------------------------------------------------------------------|------------|--------------------|
|                                                                    |           |    |     |                                        |       | patients,<br>nursing<br>home/long<br>term care<br>resident | neurological<br>disorder                 |                                                                         |            |                    |
| Mwipatayi,<br>2004[101]                                            | Australia | 2  | No  | Mixed<br>arterial/venous<br>leg ulcers | NR    | NR                                                         | NR                                       | NR                                                                      | NR         | NR                 |
| Singh,<br>2004[61]                                                 | India     | 12 | Yes | Mixed chronic<br>wounds                | >24   | NR                                                         | Diabetes                                 | Hospital                                                                | NR         | NR                 |
| TenBrook,<br>2004[102]                                             | USA       | 20 | Yes | Venous leg<br>ulcers                   | 44-67 | Venous<br>Insufficiency                                    | NR                                       | Hospital                                                                | NR         | 32-576<br>weeks    |
| Berliner,<br>2003[103]                                             | USA       | 8  | Yes | Venous leg<br>ulcers                   | NR    | NR                                                         | NR                                       | NR                                                                      | NR         | NR                 |
| Pham,<br>2003[104]                                                 | Australia | 17 | Yes | Pressure ulcers                        | NR    | Diabetic,<br>surgical                                      | NR                                       | NR                                                                      | NR         | 2 days-40<br>weeks |
| Wang,<br>2003[105]                                                 | USA       | 57 | Yes | Venous leg<br>ulcers                   | NR    | NR                                                         | Diabetes,<br>arterial<br>insufficiencies | NR                                                                      | NR         | NR                 |
| Cullum,<br>2001a[62]<br>(CR:<br>Cullum,<br>2008[125])              | UK        | 69 | Yes | Pressure ulcers                        | NR    | NR                                                         | NR                                       | Hospital/nursing<br>home                                                | 2-36 weeks | NR                 |
| Cullum,<br>2001b[62]<br>(CR:<br>Cullum,<br>2008[125])              | UK        | 45 | Yes | Venous leg<br>ulcers                   | NR    | NR                                                         | NR                                       | Any care setting<br>(mainly hospitals,<br>long term care<br>facilities) | NR         | NR                 |
| Cullum,<br>2001c[62]<br>(CR:<br>Cullum,<br>2008[125])              | UK        | 24 | Yes | Mixed chronic<br>wounds                | NR    | NR                                                         | NR                                       | Any care setting                                                        | NR         | NR                 |
| Emergency<br>Care<br>Research<br>Institute<br>(ECRI),<br>2001[106] | USA       | 10 | Yes | Pressure ulcers                        | NR    | NR                                                         | NR                                       | Home and "other<br>settings"                                            | 36 weeks   | NR                 |

|                                             |             |    |     |                                                     |       |                                                               |    |                                         |                             |                        |
|---------------------------------------------|-------------|----|-----|-----------------------------------------------------|-------|---------------------------------------------------------------|----|-----------------------------------------|-----------------------------|------------------------|
| Evans, 2001[107]                            | UK          | 2  | Yes | Venous leg ulcers                                   | 18-75 | Diabetics, pressure, trauma                                   | NR | NR                                      | 3- 6 weeks                  | NR                     |
| Lewis, 2001[108]                            | UK          | 17 | Yes | Infected surgical wounds                            | NR    | NR                                                            | NR | Hospital and clinic                     | NR                          | NR                     |
| Moore, 2001[109]                            | Ireland     | 1  | Yes | Infected surgical wounds                            | NR    | NR                                                            | NR | NR                                      | NR                          | NR                     |
| O'Meara, 2001[110] (CR: O'Meara, 2000[124]) | UK          | 22 | Yes | Mixed arterial/venous leg ulcers                    | NR    | Venous and arterial insufficiency, limited mobility, diabetic | NR | NR                                      | NR                          | NR                     |
| Lucas, 2000[63]                             | Netherlands | 4  | Yes | Mixed chronic wounds                                | NR    | NR                                                            | NR | NR                                      | NR                          | NR                     |
| Bradley, 1999a[111]                         | UK          | 35 | Yes | Mixed chronic wounds, venous leg ulcers             | NR    | NR                                                            | NR | NR                                      | NR                          | NR                     |
| Bradley, 1999b[64]                          | UK          | 93 | Yes | Pressure ulcers, venous leg ulcers                  | NR    | NR                                                            | NR | NR                                      | NR                          | NR                     |
| Mason, 1999[112]                            | UK          | 29 | Yes | Diabetic foot /leg ulcers                           | NR    | Type I & II diabetics                                         | NR | NR                                      | NR                          | NR                     |
| Johannsen, 1998[65]                         | Denmark     | 6  | Yes | Mixed arterial/venous leg ulcers, venous leg ulcers | 61-73 | Adults with chronic venous leg ulceration                     | NR | NR                                      | 4-12 weeks                  | NR                     |
| Palfreyman, 1998[66]                        | UK          | 8  | Yes | Venous leg ulcers                                   | NR    | NR                                                            | NR | Includes ambulatory, clinic, outpatient | 13-78.3 weeks (if reported) | 26 weeks (if reported) |
| Fletcher, 1997[67]                          | UK          | 24 | Yes | Venous leg ulcers                                   | NR    | NR                                                            | NR | Hospital                                | NR                          | NR                     |

Note: NA = not applicable, NR = not reported, RCT = randomized clinical trial.
