# Supplementary material for: Seeking effective interventions to treat complex wounds: an overview of systematic reviews
Source: PubMed Central journal article supplement (PMC4406332; doi:10.1186/s12916-015-0288-5), 2015-04-22
Supplement: 12916_2015_288_MOESM4_ESM.pdf [file 12916_2015_288_MOESM4_ESM.pdf]

| <b>Meta-analysis results</b>                                                 |                                               |                           |                                                   |                                 |                      |           |              |           |               |                                                                                   |
|------------------------------------------------------------------------------|-----------------------------------------------|---------------------------|---------------------------------------------------|---------------------------------|----------------------|-----------|--------------|-----------|---------------|-----------------------------------------------------------------------------------|
| <b>Intervention</b>                                                          | <b>Review</b>                                 | <b># of studies in MA</b> | <b>Comparator</b>                                 | <b>Results of meta-analysis</b> |                      |           |              |           |               | <b>Conclusion</b>                                                                 |
|                                                                              |                                               |                           |                                                   | <b>RR</b>                       | <b>95% CI</b>        | <b>OR</b> | <b>95%CI</b> | <b>MD</b> | <b>95% CI</b> |                                                                                   |
| <b><i>Venous leg ulcers – wound area/size reduction (2 MAs)</i></b>          |                                               |                           |                                                   |                                 |                      |           |              |           |               |                                                                                   |
| Cadexomer iodine (topical)                                                   | O'Meara, 2010[36]<br>(CR: O'Meara, 2008[121]) | 2                         | Standard care                                     | 0.47                            | 0.26, 0.69           | NR        | NR           | NR        | NR            | Cadexomer iodine more effective than standard care*                               |
| Micronized purified flavonoid fraction (MPFF) (oral)                         | Coleridge-Smith, 2005[56]                     | 5                         | Placebo or standard compression                   | 54% and 44% (7%, 94%)           | 0%, 137% and 7%, 94% | NR        | NR           | NR        | NR            | Micronized purified flavonoid more effective than placebo or standard compression |
| <b><i>Venous leg ulcers – time to healing or rate of healing (5 MAs)</i></b> |                                               |                           |                                                   |                                 |                      |           |              |           |               |                                                                                   |
| 4-layer bandage                                                              | O'Meara, 2009a[44]                            | 5                         | Short stretch bandage                             | 1.31                            | 1.09, 1.58           | NR        | NR           | NR        | NR            | 4-layer bandage more effective than short stretch bandage*                        |
|                                                                              | O'Meara, 2009b[45]                            | 2                         | Compression system with paste bandage as the base | 0.52                            | 0.06, 0.97           | NR        | NR           | NR        | NR            | 4-layer bandage more effective than compression system*                           |
| Micronized purified flavonoid fraction (MPFF) (oral)                         | Coleridge-Smith, 2005[56]                     | NR                        | Placebo or standard compression                   | 32%                             | 3%, 70%              | NR        | NR           | NR        | NR            | Micronized purified flavonoid more effective than placebo or standard compression |

|                                                            |                                           |    |                                            |      |            |      |             |                       |              |                                                                                  |
|------------------------------------------------------------|-------------------------------------------|----|--------------------------------------------|------|------------|------|-------------|-----------------------|--------------|----------------------------------------------------------------------------------|
| Stockings                                                  | Amsler, 2009[39]                          | 7  | Bandages                                   | NR   | NR         | NR   | NR          | Standardized MD -0.33 | -0.50, -0.16 | Bandages more effective than stockings                                           |
|                                                            | Amsler, 2009[39]                          | 3  | Bandages                                   | NR   | NR         | NR   | NR          | Standardized MD -0.56 | -0.83, -0.28 | Stockings more effective than bandages                                           |
| Silver-impregnated dressings                               | Carter, 2010[34]                          | 7  | Non-silver dressings                       | NR   | NR         | NR   | NR          | 0.02                  | -0.01, 0.06  | Nsd                                                                              |
| <b><i>Venous leg ulcers – ulcer healing (8 MAs)</i></b>    |                                           |    |                                            |      |            |      |             |                       |              |                                                                                  |
| Elastic high compression bandages                          | Cullum, 2001b[62] (CR: Cullum, 2008[125]) | 3  | Multi-layer inelastic compression bandages | 1.54 | 1.19, 1.99 | NR   | NR          | NR                    | NR           | Elastic high compression more effective than multi-layer inelastic compression * |
| Cryopreserved allografts (Skin grafting)                   | Jones, 2007[51]                           | 2  | Dressings                                  | 1.62 | 0.79, 3.33 | NR   | NR          | NR                    | NR           | Nsd                                                                              |
| Cultured keratinocytes / epidermal grafts (Skin grafting)  | Jones, 2007[51]                           | 4  | Dressings                                  | 1.73 | 0.91, 3.28 | NR   | NR          | NR                    | NR           | Nsd                                                                              |
| Fresh allografts (Skin grafting)                           | Jones, 2007[51]                           | 2  | Dressings                                  | 2.06 | 0.54, 7.9  | NR   | NR          | NR                    | NR           | Nsd                                                                              |
| Granulocyte-macrophage colony stimulating factor (topical) | Hu, 2011[29]                              | 2  | Placebo                                    | NR   | NR         | 6.5  | 2.15, 19.66 | NR                    | NR           | Granulocyte-macrophage colony stimulating factor more effective than placebo     |
| Pentoxifylline (oral)                                      | Jull, 2011[30] (CR: Jull, 2007[118])      | 11 | All other treatments                       | 1.7  | 1.30, 2.24 | NR   | NR          | NR                    | NR           | Pentoxifylline more effective than all other treatments *                        |
| Stockings                                                  | Amsler, 2009[39]                          | 8  | Bandages                                   | NR   | NR         | 0.44 | 0.32, 0.61  | NR                    | NR           | Stockings more effective than bandages                                           |
| Tissue engineered skin                                     | Jones, 2007[51]                           | 2  | Dressings                                  | 1.51 | 1.22, 1.88 | NR   | NR          | NR                    | NR           | Tissue engineered skin more effective than dressings                             |

| <b><i>Venous leg ulcers – proportion of patients with healed wounds (40 MAs)</i></b>             |                                              |   |                                                   |      |             |      |             |    |    |                                                       |
|--------------------------------------------------------------------------------------------------|----------------------------------------------|---|---------------------------------------------------|------|-------------|------|-------------|----|----|-------------------------------------------------------|
| 4-layer bandage                                                                                  | Cullum, 2001b[62]<br>(CR: Cullum, 2008[125]) | 3 | Other multi-layer high compression bandages       | 1.02 | 0.87, 1.18  | NR   | NR          | NR | NR | Nsd*                                                  |
|                                                                                                  | O'Meara, 2009b[45]                           | 2 | Compression system with paste bandage as the base | 1.34 | 0.78, 2.28  | NR   | NR          | NR | NR | Nsd*                                                  |
|                                                                                                  | O'Meara, 2009b[45]                           | 4 | Multi-layer short-stretch bandage                 | 1.12 | 0.96, 1.31  | NR   | NR          | NR | NR | Nsd*                                                  |
| Any laser (unspecified low level laser, ultraviolet therapy, non-coherent unpolarized red light) | Flemming, 2008[48]                           | 2 | Sham                                              | 1.21 | 0.73, 2.03  | NR   | NR          | NR | NR | Nsd                                                   |
| Artificial skin graft and standard wound care                                                    | Ho, 2005[58]                                 | 3 | Standard wound care                               | 1.6  | 0.57, 4.46  | NR   | NR          | NR | NR | Nsd                                                   |
| Autologous platelet-rich plasma (topical)                                                        | Martinez-Zapata, 2012[21]                    | 2 | Standard treatment with/without placebo           | 1.02 | 0.81, 1.27  | NR   | NR          | NR | NR | Nsd                                                   |
| Cadexomer iodine (topical) plus compression therapy                                              | O'Meara, 2010[36]<br>(CR: O'Meara 2009[121]) | 2 | Standard care plus compression therapy            | 6.72 | 1.56, 28.95 | NR   | NR          | NR | NR | Cadexomer iodine more effective than standard care*   |
| Systemic ciprofloxacin (oral)                                                                    | O'Meara, 2010[36]<br>(CR: O'Meara 2009[121]) | 2 | Standard care/placebo                             | 1.72 | 0.57, 5.16  | NR   | NR          | NR | NR | Nsd*                                                  |
| Skin replacement therapy (Dermagraft)                                                            | Barber, 2008[46]                             | 2 | Standard compression therapy                      | NR   | NR          | 4.48 | 1.01, 19.80 | NR | NR | Skin replacement therapy more effective than standard |

|                                                                           |                      |   |                                                              |      |            |      |            |    |    |                                                                                          |
|---------------------------------------------------------------------------|----------------------|---|--------------------------------------------------------------|------|------------|------|------------|----|----|------------------------------------------------------------------------------------------|
|                                                                           |                      |   |                                                              |      |            |      |            |    |    | compression therapy                                                                      |
| Elastic high compression bandages                                         | Fletcher, 1997[67]   | 3 | Inelastic compression bandages                               | NR   | NR         | 2.26 | 1.4, 3.7   | NR | NR | Elastic multi-layer high compression bandage more effective than inelastic compression * |
|                                                                           | O'Meara, 2009b[45]   | 2 | Components including inelastic bandage                       | 1.83 | 1.26, 2.67 | NR   | NR         | NR | NR | Elastic bandage more effective than inelastic bandage *                                  |
| Foam dressing                                                             | Palfreyman, 2007[52] | 2 | Low adherent dressings                                       | 1.35 | 0.93, 1.94 | NR   | NR         | NR | NR | Nsd*                                                                                     |
|                                                                           | Palfreyman, 2007[52] | 2 | Foam dressing                                                | 1.2  | 0.77, 1.87 | NR   | NR         | NR | NR | Nsd*                                                                                     |
| Granulocyte-macrophage colony stimulating factor (perilesional injection) | O'Donnell, 2006[53]  | 8 | Control (non-adherent, visco paste, gauze pad, hydrocolloid) | 0.2  | 0.1, 0.3   | NR   | NR         | NR | NR | Granulocyte-macrophage colony stimulating factor more effective than control             |
| High frequency ultrasound                                                 | Cullum, 2011[25]     | 6 | No ultrasound                                                | 1.34 | 0.99, 1.80 | NR   | NR         | NR | NR | Nsd*                                                                                     |
| Honey (topical)                                                           | Jull, 2009[40]       | 2 | Control (non-specified)                                      | 1.15 | 0.96, 1.38 | NR   | NR         | NR | NR | Nsd*                                                                                     |
| Hydrocolloid dressings                                                    | Bouza, 2005b[55]     | 8 | Traditional dressings                                        | 0.99 | 0.85, 1.15 | NA   | NA         | NA | NA | Nsd*                                                                                     |
|                                                                           | Bradley, 1999b[64]   | 8 | Traditional dressings                                        | NR   | NR         | 1.45 | 0.83, 2.54 | NR | NR | Nsd*                                                                                     |
|                                                                           | Bradley, 1999b[64]   | 2 | Foam dressing                                                | NR   | NR         | 1    | 0.48, 2.08 | NR | NR | Nsd*                                                                                     |
|                                                                           | Palfreyman, 2007[52] | 8 | Low adherent dressings                                       | 1.02 | 0.83, 1.25 | NR   | NR         | NR | NR | Nsd*                                                                                     |
|                                                                           | Palfreyman, 2007[52] | 4 | Foam dressing                                                | 0.98 | 0.79, 1.22 | NR   | NR         | NR | NR | Nsd*                                                                                     |
|                                                                           | Palfreyman,          | 3 | Alginate dressing                                            | 0.72 | 0.15,      | NR   | NR         | NR | NR | Nsd*                                                                                     |

|                                              |                                           |   |                                      |      |             |      |            |    |    |                                                                                              |
|----------------------------------------------|-------------------------------------------|---|--------------------------------------|------|-------------|------|------------|----|----|----------------------------------------------------------------------------------------------|
|                                              | 2007[52]                                  |   |                                      |      | 3.42        |      |            |    |    |                                                                                              |
|                                              | Palfreyman, 2007[52]                      | 3 | Hydrocolloid dressing                | 1.56 | 0.67, 3.63  | NR   | NR         | NR | NR | Nsd*                                                                                         |
| Hydrogel dressing                            | Palfreyman, 2007[52]                      | 2 | Low adherent dressings               | 1.53 | 0.96, 2.42  | NR   | NR         | NR | NR | Nsd*                                                                                         |
| Intermittent pneumatic compression stockings | Fletcher, 1997[67]                        | 2 | Compression stockings or Unna's boot | NR   | NR          | 10   | 3.33, 33.8 | NR | NR | Intermittent pneumatic compression more effective than compression stockings or Unna's boot* |
|                                              | Palfreyman, 1998[66]                      | 2 | No intermittent compression          | NR   | NR          | 8.45 | NR         | NR | NR | Nsd, CI NR                                                                                   |
|                                              | Nelson, 2011b[31]                         | 3 | Compression stockings                | 1.09 | 0.91, 1.30  | NR   | NR         | NR | NR | Nsd*                                                                                         |
| Low frequency ultrasound                     | Cullum, 2011[25]                          | 2 | No ultrasound                        | 3.91 | 0.47, 32.85 | NR   | NR         | NR | NR | Nsd*                                                                                         |
| Multi-layer high compression bandages        | Cullum, 2001b[62] (CR: Cullum, 2008[125]) | 5 | Inelastic compression bandages       | 1.08 | 0.79, 1.49  | NR   | NR         | NR | NR | Nsd*                                                                                         |
|                                              | Cullum, 2001b[62] (CR: Cullum, 2008[125]) | 4 | Single-layer compression bandages    | 1.41 | 1.12, 1.77  | NR   | NR         | NR | NR | Multi-layer high compression more effective than single-layer compression*                   |
|                                              | Fletcher, 1997[67]                        | 4 | Single layer systems                 | NR   | NR          | 2.2  | 1.3, 3.5   | NR | NR | Elastic multi-layer high compression bandage more effective than single layer systems*       |
| Pentoxifylline (oral) with and without       | Jull, 2011[30]                            | 7 | Placebo                              | 1.56 | 1.14, 2.13  | NR   | NR         | NR | NR | Pentoxifylline with                                                                          |

|                                                                                    |                                                                       |   |                                                                                     |      |            |     |    |       |             |                                                                     |
|------------------------------------------------------------------------------------|-----------------------------------------------------------------------|---|-------------------------------------------------------------------------------------|------|------------|-----|----|-------|-------------|---------------------------------------------------------------------|
| compression                                                                        | (CR: Jull, 2007[118])                                                 |   |                                                                                     |      |            |     |    |       |             | compression more effective than placebo*                            |
|                                                                                    | Jull, 2011[30] (CR: Jull, 2007[118])                                  | 4 | Placebo                                                                             | 2.25 | 1.49-3.39  | NR  | NR | NR    | NR          | Pentoxifylline without compression more effective than placebo*     |
| Stockings                                                                          | Cullum, 2001b[62] (CR: Cullum, 2008[125])                             | 2 | Compression bandaging                                                               | 1.39 | 1.00, 1.92 | NR  | NR | NR    | NR          | High compression stockings more effective than compression bandage* |
| Two-component (outer elastic) bandages                                             | O'Meara, 2009b[45]                                                    | 2 | Two-component (outer elastic)                                                       | 1.23 | 0.67, 2.25 | NR  | NR | NR    | NR          | Nsd*                                                                |
|                                                                                    | O'Meara, 2009b[45]                                                    | 2 | Short-stretch bandage                                                               | 1.72 | 1.14, 2.58 | NR  | NR | NR    | NR          | 2-layer stocking more effective than short-stretch bandage*         |
| Ultrasound                                                                         | Johannsen, 1998[65]                                                   | 5 | No ultrasound                                                                       | NR   | NR         | NR  | NR | 15    | 1, 30       | Ultrasound more effective than no ultrasound                        |
| Unna's boot                                                                        | Palfreyman, 1998[66]                                                  | 3 | Other therapies                                                                     | NR   | NR         | 5.8 | NR | NR    | NR          | Nsd, CI NR                                                          |
| Zinc (oral)                                                                        | Wilkinson, 2012 [23] (CR: Wilkinson, 1999[115], Wilkinson, 1998[116]) | 4 | Placebo                                                                             | 1.22 | 0.88, 1.68 | NR  | NR | NR    | NR          | Nsd*                                                                |
| <b><i>Mixed arterial/venous leg ulcers – wound area/size reduction (3 MAs)</i></b> |                                                                       |   |                                                                                     |      |            |     |    |       |             |                                                                     |
| Silver treatments (topical) and silver-impregnated dressings                       | Carter, 2010[34]                                                      | 5 | Placebo, conservative wound care or treatment, not another type of silver treatment | NR   | NR         | NR  | NR | 10.29 | 3.86, 16.71 | Silver treatments more effective than placebo or conservative       |

|                                                                                                    |                           |   |                                                   |                      |             |      |            |       |             |                                                                                   |
|----------------------------------------------------------------------------------------------------|---------------------------|---|---------------------------------------------------|----------------------|-------------|------|------------|-------|-------------|-----------------------------------------------------------------------------------|
|                                                                                                    |                           |   |                                                   |                      |             |      |            |       |             | wound care or non-silver therapies                                                |
|                                                                                                    | Carter, 2010[34]          | 3 | Non-silver dressings                              | NR                   | NR          | NR   | NR         | 0.01  | -0.02, 0.05 | Nsd                                                                               |
| Ultrasound                                                                                         | Johannsen, 1998[65]       | 6 | Standard treatment, placebo                       | NR                   | NR          | NR   | NR         | 14.5  | 6.6, 22.3   | Ultrasound more effective than standard treatment or placebo                      |
| <b><i>Mixed arterial/venous leg ulcers – time to healing or rate of healing (5 MAs)</i></b>        |                           |   |                                                   |                      |             |      |            |       |             |                                                                                   |
| Topical negative pressure                                                                          | Sadat, 2008[49]           | 2 | Conventional therapy                              | NR                   | NR          | 1.93 | 1.05, 3.56 | -1.04 | 1.83, -0.25 | Topical negative pressure more effective than conventional therapy                |
| 4-layer bandage                                                                                    | O'Meara, 2009b[45]        | 2 | Compression system with paste bandage as the base | 0.52                 | 0.06, 0.97  | NR   | NR         | NR    | NR          | 4-layer bandage more effective than compression system*                           |
| Micronized purified flavonoid fraction (oral)                                                      | Coleridge-Smith, 2005[56] | 4 | Placebo or standard compression                   | Reduction of RR % 32 | 3.0, 70.0   | NR   | NR         | NR    | NR          | Micronized purified flavonoid more effective than placebo or standard compression |
| Polyurethane (dressing)                                                                            | Bouza, 2005b[55]          | 3 | Conventional care                                 | 0.92                 | 0.14, 1.98  | NA   | NA         | NA    | NA          | Nsd*                                                                              |
| Alginate (beads, paste + dressing, alginate dressing)                                              | Bouza, 2005b[55]          | 2 | Conventional care                                 | 1.10                 | 0.86, 1.43  | NA   | NA         | NA    | NA          | Nsd*                                                                              |
| <b><i>Mixed arterial/venous leg ulcers – proportion of patients with healed wounds (3 MAs)</i></b> |                           |   |                                                   |                      |             |      |            |       |             |                                                                                   |
| Silver dressings (topical or impregnated)                                                          | Chambers, 2007[50]        | 2 | Placebo/no treatment                              | 1.79                 | 0.19, 17.11 | NR   | NR         | NR    | NR          | Nsd                                                                               |
|                                                                                                    | Chambers, 2007[50]        | 2 | Placebo/no treatment                              | 1.66                 | 0.68, 4.05  | NR   | NR         | NR    | NR          | Nsd                                                                               |
| Topical negative                                                                                   | Sadat,                    | 2 | Conventional                                      | NR                   | NR          | 1.93 | 1.05,      | NR    | NR          | Topical                                                                           |

|                                                                                                                                                                                                                                                                                                                                                                                                                                                                                                                                                                       |                    |    |                    |      |            |    |      |    |    |                                                              |
|-----------------------------------------------------------------------------------------------------------------------------------------------------------------------------------------------------------------------------------------------------------------------------------------------------------------------------------------------------------------------------------------------------------------------------------------------------------------------------------------------------------------------------------------------------------------------|--------------------|----|--------------------|------|------------|----|------|----|----|--------------------------------------------------------------|
| pressure                                                                                                                                                                                                                                                                                                                                                                                                                                                                                                                                                              | 2008[49]           |    | therapy            |      |            |    | 3.56 |    |    | negative more effective than conventional therapy            |
| <b><i>Diabetic foot/leg ulcers – ulcer healing (4 MAs)</i></b>                                                                                                                                                                                                                                                                                                                                                                                                                                                                                                        |                    |    |                    |      |            |    |      |    |    |                                                              |
| Chinese herbal medicine + standard therapy ( <i>Bu-yang-huan-wu</i> decoction, <i>Tao-hong-si-wu</i> decoction, <i>Si-miao-yong-an</i> decoction, Radix astragali, Rhizoma atractylodis, marcocephalae, Radix stephaniae tetrandrae, Radix Polygoni multifori, Radix Rehmanniae, Radix smilax china, Frusctus corni, Rhizoma dioscoreae, Cortex Moutan, Rhizoma alismatis, Rhizoma smilacis glabrae, Frutus schisandrae, Herba Siegesbeckiae, Draconis Sanguis, Lumbricus, Radix Ligustici, Chuanxiogm, Ramulus Cinnamomi Cassiae, <i>She-xiang-huo-xue capsule</i> ) | Chen, 2010[35]     | 6  | Standard therapy   | 0.34 | 0.21, 0.53 | NR | NR   | NR | NR | Chinese herbal medicine more effective than standard therapy |
| Granulocyte colony-stimulating factor (SC, IV) + antibiotics (oral, IV)                                                                                                                                                                                                                                                                                                                                                                                                                                                                                               | Cruciani, 2005[57] | NR | Placebo/usual care | NR   | NR         | NR | NR   | NR | NR | Nsd, data not shown                                          |
|                                                                                                                                                                                                                                                                                                                                                                                                                                                                                                                                                                       | Cruciani, 2011[24] | 4  | Control            | 1.4  | 1.06, 1.85 | NR | NR   | NR | NR | Granulocyte colony-stimulating factor more effective than    |



|                                                                                                                                                                                                                                                                                                                                                                                                                                                                                                                                                    |                    |   |                     |      |              |    |    |    |    |                                                                |
|----------------------------------------------------------------------------------------------------------------------------------------------------------------------------------------------------------------------------------------------------------------------------------------------------------------------------------------------------------------------------------------------------------------------------------------------------------------------------------------------------------------------------------------------------|--------------------|---|---------------------|------|--------------|----|----|----|----|----------------------------------------------------------------|
|                                                                                                                                                                                                                                                                                                                                                                                                                                                                                                                                                    |                    |   |                     |      |              |    |    |    |    | control*                                                       |
|                                                                                                                                                                                                                                                                                                                                                                                                                                                                                                                                                    | Cruciani, 2011[24] | 2 | Usual care, placebo | 9.45 | 0.54, 164.49 | NR | NR | NR | NR | Nsd*                                                           |
| <b><i>Diabetic foot/leg ulcers – no healing improvement/non-healed wounds (5 MAs)</i></b>                                                                                                                                                                                                                                                                                                                                                                                                                                                          |                    |   |                     |      |              |    |    |    |    |                                                                |
| Chinese herbal medicine ( <i>Bu-yang-huan-wu</i> decoction, <i>Tao-hong-si-wu</i> decoction, <i>Si-miao-yong-an</i> decoction, Radix astragali, Rhizoma atractylodis, marcocephalae, Radix stephaniae tetrandrae, Radix Polygoni multifori, Radix Rehmanniae, Radix smilax china, Frusctus corni, Rhizoma dioscoreae, Cortex Moutan, Rhizoma alismatis, Rhizoma smilacis glabrae, Frutus schisandrae, Herba Siegesbeckiae, Draconis Sanguis, Lumbricus, Radix Ligustici, Chuanxiogm, Ramulus Cinnamomi Cassiae, <i>She-xiang-huo-xue capsule</i> ) | Chen, 2010[35]     | 6 | Standard therapy    | 0.34 | 0.21, 0.53   | NR | NR | NR | NR | Chinese herbal medicine more effective than standard therapy   |
| Hyaluronic acid based scaffold and keratinocytes                                                                                                                                                                                                                                                                                                                                                                                                                                                                                                   | Voigt, 2012[22]    | 2 | Standard of care    | 0.9  | 0.76, 1.07   | NR | NR | NR | NR | Nsd*                                                           |
| Hyaluronic acid based derivative                                                                                                                                                                                                                                                                                                                                                                                                                                                                                                                   | Voigt, 2012[22]    | 2 | Standard of care    | 0.24 | 0.12, 0.49   | NR | NR | NR | NR | Hyaluronic acid based derivatives more effective than standard |

|                                                                                                                                                                                                                                                                                                     |                     |   |                              |      |            |    |    |    |    |                                                                                           |
|-----------------------------------------------------------------------------------------------------------------------------------------------------------------------------------------------------------------------------------------------------------------------------------------------------|---------------------|---|------------------------------|------|------------|----|----|----|----|-------------------------------------------------------------------------------------------|
|                                                                                                                                                                                                                                                                                                     |                     |   |                              |      |            |    |    |    |    | care*                                                                                     |
| Low frequency low intensity noncontact ultrasound                                                                                                                                                                                                                                                   | Voigt, 2011[33]     | 2 | Sharps debridement           | 0.74 | 0.58, 0.95 | NR | NR | NR | NR | Low frequency low intensity noncontact ultrasound more effective than sharps debridement* |
|                                                                                                                                                                                                                                                                                                     | Voigt, 2011[33]     | 2 | Sharps debridement           | 0.64 | 0.46, 0.89 | NR | NR | NR | NR | Low frequency low intensity noncontact ultrasound more effective than sharps debridement* |
| <b><i>Diabetic foot/leg ulcers – proportion of patients with healed wounds (18 MAs)</i></b>                                                                                                                                                                                                         |                     |   |                              |      |            |    |    |    |    |                                                                                           |
| Alginate dressing                                                                                                                                                                                                                                                                                   | Dumville, 2012b[18] | 2 | Basic wound contact dressing | 1.09 | 0.66, 1.80 | NA | NA | NA | NA | Nsd*                                                                                      |
|                                                                                                                                                                                                                                                                                                     | Dumville, 2012b[18] | 2 | Foam dressing                | 0.67 | 0.41, 1.08 | NA | NA | NA | NA | Nsd*                                                                                      |
| Artificial skin graft and standard care                                                                                                                                                                                                                                                             | Ho, 2005[58]        | 9 | Standard care                | 1.4  | 1.21, 1.63 | NR | NR | NR | NR | Artificial skin graft with standard care more effective than usual care alone             |
| Chinese herbal medicine plus standard treatment ( <i>Tao-hong-si-wu</i> decoction, <i>Si-miao-yong-an</i> decoction, Radix astragali, Radix Rehmanniae, Herba Siegesbeckiae, Draconis Sanguis, Lumbricus, Radix Ligustici, Chuanxiogm, Ramulus Cinnamomi Cassiae, <i>She-xiang-huo-xue</i> capsule) | Chen, 2010[35]      | 4 | Standard therapy             | 0.62 | 0.39, 0.97 | NR | NR | NR | NR | Chinese herbal medicine more effective than standard therapy                              |

|                                                                         |                           |    |                               |      |              |      |             |    |    |                                                                       |
|-------------------------------------------------------------------------|---------------------------|----|-------------------------------|------|--------------|------|-------------|----|----|-----------------------------------------------------------------------|
| Skin graft (Dermagraft)                                                 | Barber, 2008[46]          | 3  | Standard saline dressings     | NR   | NR           | 1.78 | 0.92, 3.45  | NR | NR | Nsd                                                                   |
| Fibrous-hydrocolloid (hydrofibre) dressing                              | Dumville, 2012a[17]       | 2  | Basic wound contact dressing  | 1.01 | 0.74, 1.38   | NR   | NR          | NR | NR | Nsd*                                                                  |
| Foam dressing                                                           | Dumville, 2011a[27]       | 2  | Basic wound contact dressing, | 2.03 | 0.91, 4.55   | NR   | NR          | NR | NR | Nsd*                                                                  |
|                                                                         | Dumville, 2011a[27]       | 2  | Alginate dressing,            | 1.5  | 0.92, 2.44   | NR   | NR          | NR | NR | Nsd*                                                                  |
| Granulocyte colony-stimulating factor (SC, IV) + antibiotics (oral, IV) | Cruciani, 2005[57]        | NR | Placebo/usual care            | NR   | NR           | NR   | NR          | NR | NR | Nsd, data not shown                                                   |
|                                                                         | Cruciani, 2011[24]        | 2  | Usual care/placebo            | 2.75 | 1.05, 7.20   | NR   | NR          | NR | NR | Granulocyte colony-stimulating factor more effective than usual care* |
| Hyaluronic acid based scaffold and keratinocytes                        | Voigt, 2012[22]           | 2  | Standard of care              | 0.9  | 0.76, 1.07   | NR   | NR          | NR | NR | Nsd*                                                                  |
| Hydrogel dressing                                                       | Dumville, 2011b[28]       | 3  | Basic wound dressing          | 1.8  | 1.27, 2.56   | NR   | NR          | NR | NR | Hydrogel dressing more effective than basic wound dressing*           |
|                                                                         | Dumville, 2012a[17]       | 3  | Basic wound contact dressing  | 1.8  | 1.27, 2.56   | NR   | NR          | NR | NR | Hydrogel dressing more effective than basic wound dressing*           |
|                                                                         | Edwards, 2012[19]         | 3  | Gauze or good wound care      | 1.84 | 1.30, 2.61   | NR   | NR          | NR | NR | Hydrogel more effective than gauze with usual care                    |
| Hyperbaric oxygen therapy                                               | Kranke, 2012[20]          | 3  | Hyperbaric air, sham          | 9.53 | 0.44, 207.76 | NR   | NR          | NR | NR | Nsd*                                                                  |
|                                                                         | Roeckl-Wiedmann, 2005[59] | 2  | Control                       | 4.78 | 0.94, 24.24  | NR   | NR          | NR | NR | Nsd*                                                                  |
| Platelet-rich plasma                                                    | Villela, 2010[38]         | 4  | Control                       | NR   | NR           | 7.70 | 2.94, 20.31 | NR | NR | Platelet-rich plasma more                                             |

|                                                                                                     |                                                  |   |                         |      |             |      |            |    |    |                                                                    |
|-----------------------------------------------------------------------------------------------------|--------------------------------------------------|---|-------------------------|------|-------------|------|------------|----|----|--------------------------------------------------------------------|
|                                                                                                     |                                                  |   |                         |      |             |      |            |    |    | effective than control                                             |
| Skin replacement therapy (keratinocyte allograft, meshed skin autograft, split thickness autograft) | Blozik, 2008[47]                                 | 5 | Standard care           | NR   | NR          | 1.46 | 1.21, 1.76 | NR | NR | Skin replacement therapy more effective than standard care         |
| <b><i>Pressure ulcers – ulcer healing (8 MAs)</i></b>                                               |                                                  |   |                         |      |             |      |            |    |    |                                                                    |
| Air-fluidised bed/supports                                                                          | Cullum, 2004[60]                                 | 2 | Standard care           | 1.4  | 1.04, 1.88  | NR   | NR         | NR | NR | Air-fluidised supports more effective than standard care*          |
|                                                                                                     | Cullum, 2001a[62] (CR: Cullum, 2008[125])        | 3 | Standard care           | NR   | NR          | NR   | NR         | NR | NR | Air-fluidised supports more effective than standard care (data NR) |
|                                                                                                     | Ministry of Health and Long-term Care, 2009a[43] | 2 | Conventional mattresses | 1.4  | 1.04, 1.88  | NR   | NR         | NR | NR | Air-fluidised beds more effective than conventional beds           |
| Alternative foam mattress                                                                           | Cullum, 2004[60]                                 | 5 | Standard foam mattress  | 0.4  | 0.21, 0.74  | NR   | NR         | NR | NR | Alternative foam more effective than standard foam mattress*       |
| Electrotherapy                                                                                      | Cullum, 2001a[62] (CR: Cullum, 2008[125])        | 2 | Sham electrotherapy     | 7.92 | 2.39, 26.31 | NR   | NR         | NR | NR | Electrotherapy more effective than sham*                           |
| High protein, oral nutritional support, enteral tube feeding                                        | Stratton, 2005[16]                               | 4 | Routine care            | NR   | NR          | 0.75 | 0.62, 0.89 | NR | NR | Nsd*                                                               |
| Hydrocolloid dressings                                                                              | Bradley, 1999b[64]                               | 5 | Traditional treatments  | NR   | NR          | 2.57 | 1.58, 4.18 | NR | NR | Hydrocolloid more effective than traditional                       |

|                                                                                    |                                                  |   |                                 |      |             |     |            |    |    |                  |
|------------------------------------------------------------------------------------|--------------------------------------------------|---|---------------------------------|------|-------------|-----|------------|----|----|------------------|
|                                                                                    |                                                  |   |                                 |      |             |     |            |    |    | treatments*      |
| Polyurethane dressings                                                             | Bradley, 1999b[64]                               | 4 | Dressings                       | NR   | NR          | 0.8 | 0.44, 1.44 | NR | NR | Nsd <sup>†</sup> |
| <b><i>Pressure ulcers – proportion of patients with healed wounds (25 MAs)</i></b> |                                                  |   |                                 |      |             |     |            |    |    |                  |
| Collagenase debridement (topical)                                                  | Ministry of Health and Long-term Care, 2009a[43] | 2 | Hydrocolloid occlusive dressing | 1.33 | 0.80, 2.23  | NR  | NR         | NR | NR | Nsd              |
| Dextranomer (beads + dry dressing)                                                 | Ministry of Health and Long-term Care, 2009a[43] | 2 | Hydrogel                        | 0.88 | 0.51, 1.53  | NR  | NR         | NR | NR | Nsd              |
| Electrical stimulation                                                             | Ministry of Health and Long-term Care, 2009a[43] | 3 | Placebo                         | 3.08 | 0.58, 16.41 | NR  | NR         | NR | NR | Nsd              |
| Electrotherapy                                                                     | Ministry of Health and Long-term Care, 2009a[43] | 3 | Sham therapy                    | 3.43 | 0.35, 33.61 | NR  | NR         | NR | NR | Nsd              |
| Growth Factors (topical)                                                           | Ministry of Health and Long-term Care, 2009a[43] | 4 | Placebo                         | 0.29 | 0.52, 9.98  | NR  | NR         | NR | NR | Nsd              |
|                                                                                    | Ministry of Health and Long-term Care, 2009a[43] | 2 | Placebo at 4 weeks              | 4.43 | 0.48, 40.56 | NR  | NR         | NR | NR | Nsd              |
|                                                                                    | Ministry of Health and Long-term Care,           | 2 | Placebo at 4 weeks              | 2.17 | 0.06, 81.31 | NR  | NR         | NR | NR | Nsd              |

|                        |                                                  |   |                         |      |            |    |    |    |    |                                                       |
|------------------------|--------------------------------------------------|---|-------------------------|------|------------|----|----|----|----|-------------------------------------------------------|
|                        | 2009a[43]                                        |   |                         |      |            |    |    |    |    |                                                       |
|                        | Ministry of Health and Long-term Care, 2009a[43] | 4 | Placebo                 | 2.29 | 0.52, 9.98 | NR | NR | NR | NR | Nsd                                                   |
| Hydrocolloid dressings | Ministry of Health and Long-term Care, 2009a[43] | 4 | Traditional dressing    | 3.84 | 2.30, 6.41 | NR | NR | NR | NR | Hydrocolloid more effective than traditional dressing |
|                        | Ministry of Health and Long-term Care, 2009a[43] | 2 | Hydrocolloid dressing   | 1.38 | 0.78, 2.45 | NR | NR | NR | NR | Nsd                                                   |
|                        | Ministry of Health and Long-term Care, 2009a[43] | 2 | Povidine-soaked Gauze   | 0.99 | 0.71, 1.37 | NR | NR | NR | NR | Nsd                                                   |
| Hydrogel (gel)         | Ministry of Health and Long-term Care, 2009a[43] | 2 | Hydrocolloid            | 1.71 | 1.05, 2.79 | NR | NR | NR | NR | Hydrogel more effective than hydrocolloid dressing    |
| Hydropolymer dressing  | Ministry of Health and Long-term Care, 2009a[43] | 2 | Hydrocolloid dressing   | 1.1  | 0.77, 1.59 | NR | NR | NR | NR | Nsd                                                   |
| Low-air-loss beds      | Cullum, 2001a[62] (CR: Cullum, 2008[125])        | 2 | Foam overlay            | 1.25 | 0.84, 1.86 | NR | NR | NR | NR | Nsd*                                                  |
|                        | Ministry of Health and Long-term Care,           | 2 | Convuluted foam overlay | 1.25 | 0.84, 1.86 | NR | NR | NR | NR | Nsd                                                   |

|                                  |                                                  |   |                                                           |      |            |    |    |    |    |                                                                                                     |
|----------------------------------|--------------------------------------------------|---|-----------------------------------------------------------|------|------------|----|----|----|----|-----------------------------------------------------------------------------------------------------|
|                                  | 2009a[43]                                        |   |                                                           |      |            |    |    |    |    |                                                                                                     |
| Low level laser therapy          | Ministry of Health and Long-term Care, 2009a[43] | 3 | Conventional therapy                                      | 1.26 | 0.92, 1.95 | NR | NR | NR | NR | Nsd                                                                                                 |
|                                  | Ministry of Health and Long-term Care, 2009a[43] | 3 | Conventional Therapy or Sham                              | 1.17 | 0.85, 1.63 | NR | NR | NR | NR | Nsd                                                                                                 |
| Alternating pressure mattress    | Ministry of Health and Long-term Care, 2009a[43] | 2 | Another alternating pressure mattress replacement/overlay | 0.69 | 0.18, 2.57 | NR | NR | NR | NR | Nsd                                                                                                 |
|                                  | Ministry of Health and Long-term Care, 2009a[43] | 4 | Another alternating pressure system in Hospital Setting   | 1.4  | 1.08, 1.80 | NR | NR | NR | NR | Alternating pressure mattress more effective than other alternating pressure mattresses in hospital |
| Noncontact normothermic dressing | Ministry of Health and Long-term Care, 2009a[43] | 4 | Standard care                                             | 1.31 | 0.86, 1.98 | NR | NR | NR | NR | Nsd                                                                                                 |
| Polyurethane dressings           | Ministry of Health and Long-term Care, 2009a[43] | 3 | Hydrocolloid                                              | 1.18 | 0.85, 1.64 | NR | NR | NR | NR | Nsd                                                                                                 |
| Ultrasound                       | Cullum, 2001a[62] (CR: Cullum, 2008[125])        | 2 | No ultrasound                                             | 0.97 | 0.65, 1.45 | NR | NR | NR | NR | Nsd*                                                                                                |

|                                                                 |                                                             |   |                                         |      |            |    |    |       |             |                                                            |
|-----------------------------------------------------------------|-------------------------------------------------------------|---|-----------------------------------------|------|------------|----|----|-------|-------------|------------------------------------------------------------|
|                                                                 | Ministry of Health and Long-term Care, 2009a[43]            | 2 | Sham therapy                            | 0.97 | 0.65, 1.45 | NR | NR | NR    | NR          | Nsd                                                        |
|                                                                 | Sari, 2006[54]                                              | 2 | Sham                                    | 0.97 | 0.65, 1.45 | NR | NR | NR    | NR          | Nsd*                                                       |
| Zinc supplement (oral)                                          | Ministry of Health and Long-term Care, 2009a[43]            | 2 | Placebo                                 | 0.97 | 0.22, 4.29 | NR | NR | NR    | NR          | Nsd                                                        |
| <b>Mixed chronic wounds - wound area/size reduction (5 MAs)</b> |                                                             |   |                                         |      |            |    |    |       |             |                                                            |
| Autologous platelet-rich plasma/platelet-rich plasma (topical)  | Martinez-Zapata, 2009[42] (CR to Martinez-Zapata, 2012[21]) | 3 | Control                                 | 1.8  | 0.63, 5.15 | NR | NR | NR    | NR          | Nsd*                                                       |
|                                                                 | Martinez-Zapata, 2012[21]                                   | 3 | Standard treatment with/without placebo | NR   | NR         | NR | NR | -1.94 | -4.74, 0.86 | Nsd                                                        |
|                                                                 | Martinez-Zapata, 2009[42] (CR to Martinez-Zapata, 2012[21]) | 6 | Standard treatment                      | 1.4  | 0.58, 2.31 | NR | NR | NR    | NR          | Nsd*                                                       |
| Silver releasing dressings                                      | Lo, 2009[41]                                                | 8 | Non-silver dressings                    | NR   | NR         | NR | NR | 0.28  | 0.16, 0.39  | Silver dressings more effective than non-silver dressings* |
| Topical negative pressure                                       | Suissa, 2011[32]                                            | 9 | Standard wound care                     | 0.77 | 0.63, 0.96 | NR | NR | NR    | NR          | Topical negative pressure more effective than standard     |



|                                                                                         |                                           |    |                                         |      |            |      |            |    |    |                                                                                      |
|-----------------------------------------------------------------------------------------|-------------------------------------------|----|-----------------------------------------|------|------------|------|------------|----|----|--------------------------------------------------------------------------------------|
|                                                                                         |                                           |    |                                         |      |            |      |            |    |    | wound care                                                                           |
| <b><i>Mixed chronic wounds – ulcer healing (1 MA)</i></b>                               |                                           |    |                                         |      |            |      |            |    |    |                                                                                      |
| Laser therapy                                                                           | Lucas, 2000[63]                           | 3  | Placebo or any other intervention       | 0.76 | 0.41, 1.40 | NR   | NR         | NR | NR | Nsd                                                                                  |
| <b><i>Mixed chronic wounds – proportion of patients with healed wounds (10 MAs)</i></b> |                                           |    |                                         |      |            |      |            |    |    |                                                                                      |
| Skin replacement (skin substitute) and standard care                                    | Ho, 2005[58]                              | 5  | Standard wound care                     | 1.71 | 1.34, 2.17 | NR   | NR         | NR | NR | Skin replacement more effective than standard care                                   |
| Skin replacement (dermal substitute) and standard care                                  | Ho, 2005[58]                              | 6  | Standard care                           | 1.36 | 1.11, 1.66 | NR   | NR         | NR | NR | Dermal substitute more effective than standard care                                  |
| Artificial skin grafts and standard care                                                | Ho, 2005[58]                              | 13 | Standard care                           | 1.44 | 1.22, 1.71 | NR   | NR         | NR | NR | Any artificial skin graft plus standard wound care more effective than standard care |
| Autologous platelet-rich plasma/platelet-rich plasma (topical)                          | Martinez-Zapata, 2012[21]                 | 2  | Standard treatment with/without placebo | 1.21 | 0.60, 2.41 | NR   | NR         | NR | NR | Nsd                                                                                  |
|                                                                                         | Martinez-Zapata, 2012[21]                 | 4  | Standard treatment                      | 1.85 | 0.76, 4.51 | NR   | NR         | NR | NR | Nsd                                                                                  |
| Hydrocolloid dressings                                                                  | Bouza, 2005b[55]                          | 6  | Control: other modern dressings         | 1.13 | 0.86, 1.48 | NR   | NR         | NR | NR | Nsd*                                                                                 |
|                                                                                         | Singh, 2004[61]                           | 12 | Conventional dressing                   | NR   | NR         | 1.73 | 1.08, 2.78 | NR | NR | Hydrocolloid dressings more effective than conventional dressings                    |
| Laser therapy                                                                           | Cullum, 2001c[62] (CR: Cullum, 2008[125]) | 2  | Sham                                    | 1.21 | 0.73, 2.03 | NR   | NR         | NR | NR | Nsd*                                                                                 |
| Ultrasound                                                                              | Cullum,                                   | 4  | No ultrasound                           | 1.44 | 1.01,      | NR   | NR         | NR | NR | Ultrasound                                                                           |

|                                                                                                                                                                                                                                                                 |                                                       |   |                             |      |               |      |                |       |                |                                                                                  |
|-----------------------------------------------------------------------------------------------------------------------------------------------------------------------------------------------------------------------------------------------------------------|-------------------------------------------------------|---|-----------------------------|------|---------------|------|----------------|-------|----------------|----------------------------------------------------------------------------------|
|                                                                                                                                                                                                                                                                 | 2001c[62]<br>(CR:<br>Cullum,<br>2008[125])            |   |                             |      | 2.05          |      |                |       |                | more effective<br>than no<br>ultrasound*                                         |
|                                                                                                                                                                                                                                                                 | Cullum,<br>2001c[62]<br>(CR:<br>Cullum,<br>2008[125]) | 4 | Sham- ultrasound<br>therapy | 1.18 | 0.89,<br>1.54 | NR   | NR             | NR    | NR             | Nsd*                                                                             |
| <b><i>Infected surgical wounds – proportion of patients with healed wounds (1 MA)</i></b>                                                                                                                                                                       |                                                       |   |                             |      |               |      |                |       |                |                                                                                  |
| Topical negative<br>pressure/vacuum-<br>assisted closure                                                                                                                                                                                                        | Pan,<br>2010[37]                                      | 6 | Standard treatment          | NR   | NR            | 6.43 | 3.81,<br>10.85 | NR    | NR             | Topical<br>negative<br>pressure more<br>effective than<br>standard<br>treatment  |
| <b><i>Infected surgical wounds – length of hospitalization (1 MA)</i></b>                                                                                                                                                                                       |                                                       |   |                             |      |               |      |                |       |                |                                                                                  |
| Vacuum-assisted closure                                                                                                                                                                                                                                         | Damiani,<br>2011[26]                                  | 6 | Conventional<br>therapy     | NR   | NR            | NR   | NR             | -7.18 | -10.8,<br>-3.5 | Vacuum-<br>assisted closure<br>more effective<br>than<br>conventional<br>therapy |
| Note: CI = confidence interval, MA = meta-analysis, MD = mean difference, NR = not reported, Nsd = not statistically different, OR = odds ratio, RR = relative risk, SC = subcutaneous.<br>*These are high quality systematic reviews (AMSTAR score $\geq 8$ ). |                                                       |   |                             |      |               |      |                |       |                |                                                                                  |
