# Supplementary material for: Seeking effective interventions to treat complex wounds: an overview of systematic reviews
Source: PubMed Central journal article supplement (PMC4406332; doi:10.1186/s12916-015-0288-5), 2015-04-22
Supplement: 12916_2015_288_MOESM5_ESM.pdf [file 12916_2015_288_MOESM5_ESM.pdf]

| <b>AMSTAR results for each systematic review</b>                         |                        |                                |                          |                           |                        |                              |                         |                     |                            |                                  |                         |                      |
|--------------------------------------------------------------------------|------------------------|--------------------------------|--------------------------|---------------------------|------------------------|------------------------------|-------------------------|---------------------|----------------------------|----------------------------------|-------------------------|----------------------|
| <b>Study<sup>†</sup></b>                                                 | <b>A priori design</b> | <b>Duplicate selection/ DA</b> | <b>Literature search</b> | <b>Publication status</b> | <b>List of studies</b> | <b>Study characteristics</b> | <b>Quality assessed</b> | <b>Quality used</b> | <b>Methods appropriate</b> | <b>Publication bias assessed</b> | <b>Conflicts stated</b> | <b>AMSTAR rating</b> |
| Dat, 2012[68]                                                            | Y                      | Y                              | Y                        | Y                         | Y                      | Y                            | Y                       | Y                   | Y                          | N                                | Y                       | 10                   |
| Dumville, 2011b[28]                                                      | Y                      | Y                              | Y                        | Y                         | Y                      | Y                            | Y                       | Y                   | Y                          | Y                                | Y                       | 11                   |
| Dumville, 2012a[17]                                                      | Y                      | Y                              | Y                        | Y                         | Y                      | Y                            | Y                       | Y                   | Y                          | Y                                | Y                       | 11                   |
| Edwards, 2012[19]                                                        | U                      | U                              | Y                        | Y                         | N                      | Y                            | Y                       | Y                   | Y                          | N                                | Y                       | 7                    |
| Hinchliffe, 2012[69]                                                     | U                      | Y                              | N                        | N                         | N                      | Y                            | Y                       | Y                   | Y                          | Y                                | Y                       | 7                    |
| Kranke, 2012[20]                                                         | Y                      | Y                              | Y                        | Y                         | Y                      | Y                            | Y                       | Y                   | Y                          | Y                                | Y                       | 11                   |
| Martinez-Zapata, 2012[21]                                                | U                      | Y                              | Y                        | N                         | Y                      | Y                            | Y                       | Y                   | Y                          | N                                | N                       | 7                    |
| Peters, 2012[70]                                                         | U                      | N                              | Y                        | N                         | N                      | Y                            | Y                       | Y                   | Y                          | N                                | Y                       | 6                    |
| Vermeulen, 2012[71]<br>(CR: Vermeulen, 2005[113], Vermeulen, 2004[114])  | Y                      | Y                              | Y                        | Y                         | Y                      | Y                            | Y                       | Y                   | Y                          | N                                | Y                       | 10                   |
| Voigt, 2012[22]                                                          | U                      | Y                              | Y                        | Y                         | Y                      | Y                            | Y                       | Y                   | Y                          | Y                                | Y                       | 10                   |
| Wilkinson, 2012 [23]<br>(CR: Wilkinson, 1999[115], Wilkinson, 1998[116]) | Y                      | Y                              | Y                        | N                         | Y                      | Y                            | Y                       | Y                   | Y                          | N                                | Y                       | 9                    |
| Zarchi, 2012[72]                                                         | U                      | U                              | Y                        | N                         | N                      | Y                            | N                       | NA                  | N                          | N                                | N                       | 2                    |

|                                                       |   |   |   |   |   |   |   |    |   |   |   |    |
|-------------------------------------------------------|---|---|---|---|---|---|---|----|---|---|---|----|
| Aziz,<br>2011[73]<br>(CR: Aziz,<br>2010[117])         | Y | Y | Y | Y | N | Y | Y | Y  | Y | N | Y | 9  |
| Cruciani,<br>2011[24]                                 | Y | Y | Y | Y | Y | Y | Y | Y  | Y | Y | Y | 11 |
| Cullum,<br>2011[25]                                   | Y | Y | Y | Y | Y | Y | Y | Y  | Y | N | Y | 10 |
| Damiani,<br>2011[26]                                  | U | Y | Y | N | N | Y | Y | Y  | Y | N | Y | 7  |
| Dumville,<br>2011a[27]                                | Y | Y | Y | Y | Y | Y | Y | Y  | Y | Y | Y | 11 |
| Dumville,<br>2012b[18]                                | Y | Y | Y | Y | Y | Y | Y | Y  | Y | Y | Y | 11 |
| Hu,<br>2011[29]                                       | U | U | Y | N | N | N | N | NA | N | N | Y | 2  |
| Hunt,<br>2011[79]                                     | U | Y | Y | N | N | Y | Y | Y  | Y | N | Y | 7  |
| Jull,<br>2011[30]<br>(CR: Jull,<br>2007[118])         | Y | Y | Y | Y | Y | Y | Y | Y  | Y | Y | Y | 11 |
| Lima,<br>2011[74]                                     | U | Y | Y | Y | Y | Y | Y | Y  | Y | Y | Y | 10 |
| McGinnis,<br>2011[75]                                 | Y | Y | Y | Y | Y | Y | Y | Y  | Y | Y | Y | 11 |
| McInnes,<br>2011[76]                                  | Y | Y | Y | Y | Y | Y | Y | Y  | Y | Y | Y | 11 |
| Nelson,<br>2011a[77]<br>(CR:<br>Nelson,<br>2008[119]) | U | N | Y | N | N | Y | Y | Y  | N | N | Y | 5  |
| Nelson,<br>2011b[31]                                  | Y | Y | Y | Y | Y | Y | Y | Y  | Y | N | Y | 10 |
| Reddy,<br>2011[78]                                    | U | U | Y | N | N | Y | Y | Y  | Y | N | Y | 6  |
| Suissa,<br>2011[32]                                   | U | U | Y | U | N | Y | N | NA | N | Y | Y | 4  |

|                                                             |   |   |   |   |   |   |   |    |   |   |   |    |
|-------------------------------------------------------------|---|---|---|---|---|---|---|----|---|---|---|----|
| Voigt, 2011[33]                                             | U | Y | Y | Y | N | N | Y | Y  | Y | Y | Y | 8  |
| Carter, 2010[34]                                            | U | U | Y | N | N | Y | Y | Y  | Y | Y | Y | 7  |
| Chen, 2010[35]                                              | U | Y | Y | N | N | Y | Y | Y  | Y | N | Y | 7  |
| O'Meara, 2009a[44]                                          | Y | Y | Y | Y | N | Y | Y | Y  | Y | Y | Y | 10 |
| Pan, 2010[37]                                               | U | U | Y | N | N | Y | Y | Y  | N | N | Y | 5  |
| Vermeulen, 2010[80]                                         | Y | Y | Y | Y | Y | Y | Y | Y  | Y | N | Y | 10 |
| Villela, 2010[38]                                           | U | U | Y | N | N | N | Y | Y  | Y | N | Y | 5  |
| Xie, 2010[81]                                               | U | U | Y | N | N | Y | Y | Y  | Y | Y | Y | 7  |
| Amsler, 2009[39]                                            | U | U | Y | N | N | Y | N | NA | N | N | Y | 3  |
| Jull, 2009[40]                                              | Y | Y | Y | Y | Y | Y | Y | Y  | Y | N | Y | 10 |
| Martinez-Zapata, 2009[42] (CR to Martinez-Zapata, 2012[21]) | Y | Y | Y | Y | Y | Y | Y | Y  | Y | N | Y | 10 |
| McGaughey, 2009[82]                                         | U | N | Y | Y | N | Y | Y | Y  | Y | N | N | 6  |
| Ministry of Health and Long-term Care, 2009a[43]            | U | N | Y | Y | N | Y | Y | Y  | Y | N | Y | 7  |
| Ministry of Health and Long-term Care, 2009b[83]            | U | N | Y | Y | N | Y | Y | Y  | Y | N | Y | 7  |
| Nelson,                                                     | Y | Y | Y | Y | Y | Y | Y | Y  | Y | N | Y | 10 |

|                                                        |   |   |   |   |   |   |   |    |   |   |   |    |
|--------------------------------------------------------|---|---|---|---|---|---|---|----|---|---|---|----|
| 2006[98]<br>(CR:<br>O'Meara,<br>2000[124])             |   |   |   |   |   |   |   |    |   |   |   |    |
| O'Meara,<br>2009b[45]                                  | Y | Y | Y | Y | Y | Y | Y | Y  | Y | Y | Y | 11 |
| O'Meara,<br>2010[36]<br>(CR:<br>O'Meara,<br>2009[121]) | Y | Y | Y | Y | Y | Y | Y | Y  | Y | Y | Y | 11 |
| Ramundo,<br>2009[85]<br>(CR:<br>Ramundo,<br>2008[123]) | U | U | Y | N | N | Y | N | NA | N | N | N | 2  |
| Roukis,<br>2009[86]                                    | U | U | Y | Y | N | Y | U | Y  | N | N | Y | 5  |
| Barber,<br>2008[46]                                    | U | Y | Y | Y | N | Y | Y | Y  | N | N | N | 6  |
| Blozik,<br>2008[47]                                    | U | U | Y | U | N | N | Y | N  | Y | N | N | 3  |
| Flemming,<br>2008[48]                                  | U | U | Y | Y | N | Y | Y | N  | N | N | Y | 5  |
| Heyneman,<br>2008[87]                                  | U | Y | Y | Y | N | N | Y | Y  | Y | N | Y | 7  |
| Hinchliffe,<br>2008[88]                                | U | U | Y | N | N | Y | Y | Y  | Y | N | Y | 6  |
| Howard,<br>2008[89]                                    | Y | Y | Y | Y | N | Y | Y | Y  | Y | N | Y | 9  |
| Langer,<br>2008[90]                                    | Y | Y | Y | Y | Y | Y | Y | Y  | Y | Y | Y | 11 |
| Lo,<br>2008[91]                                        | U | Y | Y | Y | Y | Y | Y | Y  | Y | Y | N | 9  |
| Moore,<br>2008[92]                                     | U | Y | Y | Y | N | N | Y | Y  | Y | N | N | 6  |
| Noble-Bell,<br>2008[93]                                | U | Y | Y | U | Y | Y | Y | Y  | Y | N | N | 7  |
| Reddy,                                                 | U | U | Y | N | N | Y | Y | Y  | N | N | Y | 5  |

|                                                      |   |   |   |   |   |   |   |    |   |   |   |    |
|------------------------------------------------------|---|---|---|---|---|---|---|----|---|---|---|----|
| 2008[94]                                             |   |   |   |   |   |   |   |    |   |   |   |    |
| Sadat,<br>2008[49]                                   | U | U | Y | U | N | Y | N | NA | N | N | N | 2  |
| Ubbink,<br>2008a[95]                                 | Y | Y | Y | Y | Y | Y | Y | Y  | Y | N | Y | 10 |
| Ubbink,<br>2008b[96]                                 | U | Y | Y | Y | N | Y | Y | Y  | Y | N | N | 7  |
| van den<br>Boogaard,<br>2008[97]                     | U | Y | Y | Y | N | Y | Y | Y  | N | N | N | 6  |
| Chambers,<br>2007[50]                                | U | Y | Y | Y | N | Y | Y | Y  | Y | N | N | 7  |
| Jones , 2007                                         | U | Y | N | N | Y | Y | N | N  | N | N | N | 3  |
| Lo,<br>2009[41]                                      | U | Y | Y | Y | N | Y | Y | Y  | Y | N | N | 7  |
| Palfreyman,<br>2007[52]                              | U | Y | Y | Y | Y | Y | Y | Y  | Y | Y | Y | 10 |
| Nelson,<br>2009[84]<br>(CR:<br>Nelson,<br>2006[122]) | U | Y | Y | Y | Y | Y | Y | Y  | Y | Y | Y | 10 |
| O'Donnell,<br>2006[53]                               | Y | U | Y | N | N | N | Y | Y  | Y | N | Y | 6  |
| Sari,<br>2006[54]                                    | Y | N | Y | Y | N | Y | Y | Y  | Y | N | Y | 8  |
| Bouza,<br>2005a[99]                                  | U | U | Y | N | N | Y | Y | Y  | Y | Y | Y | 7  |
| Bouza,<br>2005b[55]                                  | U | Y | Y | Y | N | Y | Y | Y  | Y | N | Y | 8  |
| Coleridge-<br>Smith,<br>2005[56]                     | U | U | Y | Y | N | Y | Y | Y  | N | Y | Y | 7  |
| Cruciani,<br>2005[57]                                | U | U | Y | Y | N | Y | Y | Y  | Y | Y | N | 7  |
| Ho,<br>2005[58]                                      | U | Y | Y | N | N | Y | Y | Y  | Y | N | Y | 7  |
| Roeckl-<br>Wiedmann,                                 | Y | U | Y | Y | N | Y | Y | Y  | Y | Y | N | 8  |

|                                                                    |   |   |   |   |   |   |   |    |   |   |   |    |
|--------------------------------------------------------------------|---|---|---|---|---|---|---|----|---|---|---|----|
| 2005[59]                                                           |   |   |   |   |   |   |   |    |   |   |   |    |
| Schuren,<br>2005[100]                                              | U | U | Y | Y | N | Y | Y | Y  | Y | N | Y | 7  |
| Stratton,<br>2005[16]                                              | U | U | Y | U | Y | Y | Y | Y  | Y | Y | Y | 8  |
| Cullum,<br>2004[60]                                                | Y | Y | Y | Y | Y | Y | Y | Y  | Y | N | Y | 10 |
| Mwipatayi,<br>2004[101]                                            | U | N | Y | N | N | N | Y | Y  | N | N | N | 3  |
| Singh,<br>2004[61]                                                 | U | U | N | Y | N | Y | Y | Y  | N | N | N | 4  |
| TenBrook,<br>2004[102]                                             | U | U | N | N | N | Y | N | NA | N | Y | Y | 3  |
| Berliner,<br>2003[103]                                             | U | N | Y | N | N | Y | N | NA | N | N | Y | 3  |
| Pham,<br>2003[104]                                                 | U | U | Y | Y | N | Y | Y | Y  | N | N | Y | 6  |
| Wang,<br>2003[105]                                                 | U | U | N | N | N | Y | Y | Y  | N | N | Y | 4  |
| Cullum,<br>2001a[62]<br>(CR:<br>Cullum,<br>2008[125])              | U | Y | Y | Y | Y | Y | Y | Y  | Y | Y | Y | 10 |
| Cullum,<br>2001b[62]<br>(CR:<br>Cullum,<br>2008[125])              | U | Y | Y | Y | Y | Y | Y | Y  | Y | Y | Y | 10 |
| Cullum,<br>2001c[62]<br>(CR:<br>Cullum,<br>2008[125])              | U | Y | Y | Y | Y | Y | Y | Y  | Y | Y | Y | 10 |
| Emergency<br>Care<br>Research<br>Institute<br>(ECRI),<br>2001[106] | Y | Y | Y | Y | Y | Y | Y | Y  | Y | Y | Y | 11 |

|                                                          |   |   |   |   |   |   |   |    |   |   |   |    |
|----------------------------------------------------------|---|---|---|---|---|---|---|----|---|---|---|----|
| Evans,<br>2001[107]                                      | Y | N | Y | Y | Y | Y | Y | Y  | Y | N | Y | 9  |
| Lewis,<br>2001[108]                                      | Y | Y | Y | Y | Y | Y | Y | Y  | Y | N | Y | 10 |
| Moore,<br>2001[109]                                      | U | Y | Y | N | N | N | Y | Y  | N | N | N | 4  |
| O'Meara,<br>2001[110]<br>(CR:<br>O'Meara,<br>2000[124])  | U | Y | Y | Y | N | Y | Y | Y  | Y | N | N | 7  |
| Lucas,<br>2000[63]                                       | U | Y | Y | Y | N | Y | Y | Y  | Y | N | N | 7  |
| Bradley,<br>1999a[111]                                   | U | N | Y | Y | N | Y | Y | Y  | Y | Y | Y | 8  |
| Bradley,<br>1999b[64]                                    | U | N | Y | Y | Y | Y | Y | Y  | Y | Y | Y | 9  |
| Mason,<br>1999[112]                                      | U | Y | Y | Y | N | Y | N | NA | N | N | N | 4  |
| Johannsen,<br>1998[65]                                   | U | N | Y | N | N | Y | Y | Y  | N | N | Y | 5  |
| Palfreyman,<br>1998[66]                                  | U | Y | Y | N | N | Y | Y | Y  | Y | N | N | 6  |
| Fletcher,<br>1997[67]                                    | Y | Y | Y | Y | Y | Y | Y | Y  | Y | N | Y | 10 |
| Note: NA = not applicable, N = no, U = unclear, Y = yes. |   |   |   |   |   |   |   |    |   |   |   |    |
