# Supplementary material for: Seeking effective interventions to treat complex wounds: an overview of systematic reviews
Source: PubMed Central journal article supplement (PMC4406332; doi:10.1186/s12916-015-0288-5), 2015-04-22
Supplement: 12916_2015_288_MOESM6_ESM.pdf [file 12916_2015_288_MOESM6_ESM.pdf]

| <b>Non-meta-analysis results</b>                                                |                                                |                                                    |                                                                                                                                                            |                   |
|---------------------------------------------------------------------------------|------------------------------------------------|----------------------------------------------------|------------------------------------------------------------------------------------------------------------------------------------------------------------|-------------------|
| <b>Intervention</b>                                                             | <b>Review (# of studies included)</b>          | <b>Comparator</b>                                  | <b>Conclusion</b>                                                                                                                                          | <b>Conclusion</b> |
| <i><b>Venous leg ulcers – time to healing or rate of healing (1 review)</b></i> |                                                |                                                    |                                                                                                                                                            |                   |
| Applied freeze-dried keratinocyte lysate (topical)                              | Nelson, 2011a[77] (CR: Nelson, 2008[119]) (1)  | Vehicle or usual care                              | Topically applied freeze-dried keratinocyte lysate seems no more effective at increasing healing rates at 24 weeks                                         | Neutral           |
| Collagenase (topical)                                                           | Nelson, 2011a[77] (CR: Nelson, 2008[119]) (31) | Usual care or versus each other (debriding agents) | Results are inconclusive due to incomplete reporting of the studies.                                                                                       | Indeterminate     |
| Compression stockings                                                           | Nelson, 2011a[77] (CR: Nelson, 2008[119]) (19) | Compression bandages                               | Compression stockings may be more effective at increasing healing rates and reducing mean time to healing in people with venous leg ulcers.                | Positive          |
| Flavonoids + compression                                                        | Nelson, 2011a[77] (CR: Nelson, 2008[119]) (14) | Compression                                        | We don't know whether flavonoids plus compression are more effective than compression alone at increasing ulcer healing rates                              | Indeterminate     |
| Intermittent pneumatic compression + compression                                | Nelson, 2011a[77] (CR: Nelson, 2008[119]) (4)  | Compression stockings or bandages alone            | We don't know whether adding pneumatic compression to compression stockings is more effective than stockings or bandages alone at increasing healing rates | Indeterminate     |
| Larval therapy                                                                  | Nelson, 2011a[77] (CR: Nelson, 2008[119]) (1)  | Hydrogel                                           | Compared with hydrogel, we don't know whether larval therapy is more effective at improving time to ulcer healing in people with venous leg ulcers         | Indeterminate     |
| Laser therapy                                                                   | Nelson, 2011a[77] (CR: Nelson,                 | Sham treatment                                     | Compared with sham or control treatment, we don't know whether low-level                                                                                   | Indeterminate     |

|                                                                                                           |                                                      |                                                               |                                                                                                                                                                                                                                                                                                                                            |               |
|-----------------------------------------------------------------------------------------------------------|------------------------------------------------------|---------------------------------------------------------------|--------------------------------------------------------------------------------------------------------------------------------------------------------------------------------------------------------------------------------------------------------------------------------------------------------------------------------------------|---------------|
|                                                                                                           | 2008[119]<br>(7)                                     |                                                               | laser treatment is more effective at increasing ulcer healing rates at 4 weeks to 9 months                                                                                                                                                                                                                                                 |               |
| Leg ulcer clinics, wound care program                                                                     | Nelson, 2011a[77]<br>(CR: Nelson, 2008[119])<br>(5)  | Usual care                                                    | Compared with usual care we don't know whether leg ulcer clinics are more effective at increasing ulcer healing rates                                                                                                                                                                                                                      | Indeterminate |
| Multi-layer elastomeric high-compression                                                                  | Nelson, 2011a[77]<br>(CR: Nelson, 2008[119])<br>(12) | Short-stretch bandages or Unna's boot/paste-based systems     | Multi-layer elastomeric high-compression bandages seem no more effective than short-stretch bandages at increasing healing rates, but may reduce time to healing                                                                                                                                                                           | Neutral       |
| Platelet-derived growth factor (oral)                                                                     | Nelson, 2011a[77]<br>(CR: Nelson, 2008[119])<br>(2)  | Placebo                                                       | Compared with placebo, we don't know whether platelet-derived growth factors are more effective at increasing ulcer healing rates                                                                                                                                                                                                          | Indeterminate |
| Rutosides (oral)                                                                                          | Nelson, 2011a[77]<br>(CR: Nelson, 2008[119])<br>(3)  | Placebo                                                       | Compared with placebo, we don't know whether oral rutosides alone or with compression are more effective than placebo at increasing ulcer healing rates at 6 to 12 weeks                                                                                                                                                                   | Indeterminate |
| Semi-occlusive dressings: foam, film, hyaluronic acid-derived dressings, collagen, cellulose, or alginate | Nelson, 2011a[77]<br>(CR: Nelson, 2008[119])<br>(16) | Simple low-adherent dressings, in the presence of compression | Compared with simple low-adherent dressings, semi-occlusive dressings (foam, film, hyaluronic acid-derived dressings, collagen, cellulose, or alginate) may be no more effective than simple low-adherent dressings (such as paraffin-tulle or knitted viscose dressings) at increasing wound healing rates in the presence of compression | Neutral       |
| Single-layer non-elastic system stockings                                                                 | Nelson, 2011a[77]                                    | Multi-layer non-elastic system                                | We don't know how single-layer and multi-                                                                                                                                                                                                                                                                                                  | Indeterminate |

|                                                                                                               |                                                |                                                                                                                                                                                  |                                                                                                                                                                                                                                                               |               |
|---------------------------------------------------------------------------------------------------------------|------------------------------------------------|----------------------------------------------------------------------------------------------------------------------------------------------------------------------------------|---------------------------------------------------------------------------------------------------------------------------------------------------------------------------------------------------------------------------------------------------------------|---------------|
|                                                                                                               | (CR:<br>Nelson,<br>2008[119])<br>(1)           |                                                                                                                                                                                  | layer non-elastic systems compare at increasing healing rate.                                                                                                                                                                                                 |               |
| Stockings: multi-layer elastic system, multi-layer elastomeric (or non-elastomeric) high-compression regimens | Nelson, 2011a[77] (CR: Nelson, 2008[119]) (10) | Multi-layer elastic system, multi-layer elastomeric (or non-elastomeric) high-compression regimens, four-layer compression bandages, other multi-layer high-compression bandages | Multi-layer elastomeric high-compression regimens compared with each other, four-layer compression bandages and other multi-layer high-compression bandages may be equally effective at increasing healing rates                                              | Neutral       |
| Sulodexide (oral) + compression                                                                               | Nelson, 2011a[77] (CR: Nelson, 2008[119]) (4)  | Compression                                                                                                                                                                      | Compared with compression alone, oral sulodexide plus compression is more effective at increasing healing rates at 2 to 3 months                                                                                                                              | Positive      |
| Thromboxane $\alpha_2$ antagonists (oral)                                                                     | Nelson, 2011a[77] (CR: Nelson, 2008[119]) (1)  | Placebo                                                                                                                                                                          | Compared with placebo, we don't know whether oral thromboxane $\alpha_2$ antagonists are more effective at increasing ulcer healing rates                                                                                                                     | Indeterminate |
| Topical negative pressure (vacuum-assisted closure)                                                           | Nelson, 2011a[77] (CR: Nelson, 2008[119]) (1)  | Usual care                                                                                                                                                                       | Compared with usual care, topical negative pressure (vacuum-assisted closure) may be more effective than conventional wound care techniques at reducing time to complete healing in people with venous or arteriovenous ulcers of at least 6 months' duration | Positive      |
| Ultrasound                                                                                                    | Nelson, 2011a[77] (CR: Nelson, 2008[119]) (2)  | Standard care                                                                                                                                                                    | Compared with standard care, ultrasound is no more effective than standard care at reducing time to healing at 12 weeks and increasing the proportion of people with healed ulcers at 12 months                                                               | Neutral       |
| <b><i>Venous leg ulcers – ulcer healing (5 reviews)</i></b>                                                   |                                                |                                                                                                                                                                                  |                                                                                                                                                                                                                                                               |               |
| Compression bandages,                                                                                         | Nelson,                                        | No compression                                                                                                                                                                   | Compression bandages                                                                                                                                                                                                                                          | Positive      |

|                                                                                         |                                                               |                                                                                                                                                          |                                                                                                                                                                                    |               |
|-----------------------------------------------------------------------------------------|---------------------------------------------------------------|----------------------------------------------------------------------------------------------------------------------------------------------------------|------------------------------------------------------------------------------------------------------------------------------------------------------------------------------------|---------------|
| stockings                                                                               | 2011a[77]<br>(CR:<br>Nelson,<br>2008[119])<br>(7)             |                                                                                                                                                          | and stockings heal more ulcers compared with no compression.                                                                                                                       |               |
|                                                                                         | Nelson,<br>2011a[77]<br>(CR:<br>Nelson,<br>2008[119])<br>(1)  | Intermittent pneumatic compression                                                                                                                       | The RCT is too small to draw a reliable conclusion.                                                                                                                                | Indeterminate |
| Electromagnetic therapy                                                                 | Aziz,<br>2011[73]<br>(CR: Aziz,<br>2010[117])<br>(3)          | Sham electromagnetic therapy                                                                                                                             | 2/3 trials positive for electromagnetic therapy vs sham electromagnetic therapy.                                                                                                   | Positive*     |
| Hydrocolloid (occlusive) dressings + compression                                        | Nelson,<br>2011a[77]<br>(CR:<br>Nelson,<br>2008[119])<br>(23) | Simple dressings                                                                                                                                         | Compared with simple dressings, hydrocolloid dressings are no more effective than simple low-adherent dressings at increasing ulcer healing rates in people receiving compression  | Neutral       |
| Intermittent pneumatic compression (Flowtron, sequential gradient Jobst extremity pump) | Berliner,<br>2003[103]<br>(8)                                 | Other compression devices, standard wound care (Setopress, Unna boot, debridement, ulcer cleansing, compression stocking, continued compression bandage) | 3/8 studies showed positive for intermittent pneumatic compression but available data cannot be relied on to inform the optimal choice of compression therapy or optimal protocol. | Indeterminate |
| Maggot debridement therapy                                                              | Zarchi,<br>2012[72] (7)                                       | Hydrogel, hydrocolloid, conventional therapy (saline gauze)                                                                                              | Larval therapy as being significantly more effective than hydrogel or a mixture of conventional therapy modalities, including hydrocolloid, hydrogel and saline moistened gauze.   | Positive      |
| Mesoglycan (topical)                                                                    | Nelson,<br>2011a[77]<br>(CR:<br>Nelson,<br>2008[119])<br>(1)  | Plant-based extract, topical                                                                                                                             | Compared with plant-based extract, we don't know how topical mesoglycan (a profibrinolytic agent) and plant-based extract compare at increasing ulcer healing.                     | Indeterminate |
| Skin grafts                                                                             | Nelson,<br>2011a[77]<br>(CR:                                  | Usual care or vs each other                                                                                                                              | Different types of skin grafts compared with other treatments for                                                                                                                  | Indeterminate |

|                                                                                         |                                               |                                  |                                                                                                                                                                                               |           |
|-----------------------------------------------------------------------------------------|-----------------------------------------------|----------------------------------|-----------------------------------------------------------------------------------------------------------------------------------------------------------------------------------------------|-----------|
|                                                                                         | Nelson, 2008[119]) (1)                        |                                  | leg ulcers, we don't know how different types of skin grafts and other treatments for leg ulcers compare at increasing healing of venous ulcers                                               |           |
| Superficial venous surgery                                                              | Howard, 2008[89] (54)                         | Conservative compression therapy | Surgery results in a less impressive reduction in ulcer recurrence in patients. These patients appear to still benefit from surgery due to the hemodynamic and clinical benefits that result. | Positive* |
| <b><i>Venous leg ulcers – proportion of patients with healed wounds (2 reviews)</i></b> |                                               |                                  |                                                                                                                                                                                               |           |
| Antimicrobial (topical)                                                                 | Nelson, 2011a[77] (CR: Nelson, 2008[119]) (1) | Placebo or usual care            | Compared to placebo or usual care, topical antimicrobial agents may be no more effective at increasing the proportion of people with completely healed ulcers.                                | Neutral   |
| Autologous platelet lysate (topical)                                                    | Nelson, 2011a[77] (CR: Nelson, 2008[119]) (1) | Placebo                          | Compared with placebo, topically applied autologous platelet lysate seems no more effective at increasing the proportion of people with healed ulcers at 9 months                             | Neutral   |
| Calcitonin gene-related peptide (topical)                                               | Nelson, 2011a[77] (CR: Nelson, 2008[119]) (1) | Placebo                          | Compared with placebo, calcitonin gene-related peptide plus vasoactive intestinal polypeptide seems no more effective at increasing the proportion of people with healed ulcers at 12 weeks   | Neutral   |
| Cultured allogenic bilayer skin replacement                                             | Nelson, 2011a[77] (CR: Nelson, 2008[119]) (2) | Non-adherent dressing            | Cultured allogenic bilayer skin replacement (containing both epidermal and dermal components) seems more effective at increasing the proportion of healed ulcers.                             | Positive  |

|                                                                         |                                               |                            |                                                                                                                                                                                                                                  |               |
|-------------------------------------------------------------------------|-----------------------------------------------|----------------------------|----------------------------------------------------------------------------------------------------------------------------------------------------------------------------------------------------------------------------------|---------------|
| Granulocyte-macrophage colony-stimulating factor (peri-ulcer injection) | Nelson, 2011a[77] (CR: Nelson, 2008[119]) (1) | Placebo                    | Recombinant human granulocyte-macrophage colony-stimulating factors (rHuGM-CSF) are more effective at increasing the proportion of people with completely healed ulcers at 13 weeks                                              | Positive      |
| Multi-layer elastomeric high-compression bandages                       | Nelson, 2011a[77] (CR: Nelson, 2008[119]) (4) | Single-layer bandages      | Multi-layer elastomeric high-compression bandages compared with single-layer bandage multi-layer compression bandages are more effective at increasing the proportion of people with healed ulcers                               | Positive      |
| Pentoxifylline (oral) + compression)                                    | Nelson, 2011a[77] (CR: Nelson, 2008[119]) (7) | Placebo                    | Compared with placebo, oral pentoxifylline plus compression is more effective at increasing the proportion of people with healed ulcers at 8 to 24 weeks.                                                                        | Positive      |
| Prostaglandin E1 (IV)                                                   | Nelson, 2011a[77] (CR: Nelson, 2008[119]) (1) | Placebo                    | Compared with placebo, intravenous prostaglandin E1 may be more effective at improving the number of healed ulcers at 120 days                                                                                                   | Positive      |
| Single-layer non-elastic system stockings                               | Nelson, 2011a[77] (CR: Nelson, 2008[119]) (2) | Multi-layer elastic system | Unclear whether single-layer is more effective at increasing the proportion of limbs with complete healing of ulcers                                                                                                             | Indeterminate |
| Subfascial endoscopic perforator surgery                                | Tenbrook, 2004[102] (20)                      | Unclear                    | Overall, after surgical treatment including subfascial endoscopic perforator surgery, with or without concomitant superficial venous ablation, ulcers in 88% of limbs healed. Ulcers recurred in 13%, at mean time of 21 months. | Positive      |

|                                                                                                                                                                                                                                                                                                                                                                                                                                                                                                                          |                                                        |                                                                                                                                                                       |                                                                                                                                                                                                                                                                  |               |
|--------------------------------------------------------------------------------------------------------------------------------------------------------------------------------------------------------------------------------------------------------------------------------------------------------------------------------------------------------------------------------------------------------------------------------------------------------------------------------------------------------------------------|--------------------------------------------------------|-----------------------------------------------------------------------------------------------------------------------------------------------------------------------|------------------------------------------------------------------------------------------------------------------------------------------------------------------------------------------------------------------------------------------------------------------|---------------|
| Superficial vein surgery                                                                                                                                                                                                                                                                                                                                                                                                                                                                                                 | Nelson, 2011a[77]<br>(CR: Nelson, 2008[119])<br>(2)    | No surgery or versus surgery plus skin grafting in the presence of compression                                                                                        | Perforator ligation compared with no surgery or surgery plus skin grafting, we don't know whether perforator ligation is more effective at increasing the proportion of ulcers healed at 1 year or at reducing time to ulcer healing                             | Indeterminate |
| Systemic mesoglycan (IM, oral) + compression                                                                                                                                                                                                                                                                                                                                                                                                                                                                             | Nelson, 2011a[77]<br>(CR: Nelson, 2008[119])<br>(1)    | Placebo + compression                                                                                                                                                 | Systemic mesoglycan plus compression seems more effective at increasing the proportion of people with healed ulcers.                                                                                                                                             | Positive      |
| <b><i>Mixed arterial/venous leg ulcers – ulcer healing (6 reviews)</i></b>                                                                                                                                                                                                                                                                                                                                                                                                                                               |                                                        |                                                                                                                                                                       |                                                                                                                                                                                                                                                                  |               |
| Ciprofloxacin (oral), trimethoprim (oral), polynoxilin (topical), dimethyl sulfoxide (topical), mupirocin (topical), povidone-iodine (topical) with hydrocolloid, silver cream or impregnated dressing, levamisole (oral), benzoyl peroxide (topical), AZAC cream, eosin and chloroxylenol spray, hexachlorophane lotion, oxyquinoline lotion, gentian violet 0.1% with dibutyryl adenosine (topical), amoxycillin (oral), clindamycin (oral), chlorhexadine (topical), cefotixin, metronidazole, gentamicin, Eusol pack | O'Meara, 2001[110]<br>(CR: O'Meara, 2000[124])<br>(22) | Placebo, allopurinol (topical), hydrocolloid dressing, another antibiotic, collagen gel, cetrimide lotion, clavulanic acid, hydrogel dressing, silastic foam dressing | Results do not support routine use of systemic antibiotics for leg ulcers or diabetic foot ulcers without acute infection, but they may be useful as an adjunct to surgery for pilonidal sinuses.                                                                | Neutral       |
| Electromagnetic therapy                                                                                                                                                                                                                                                                                                                                                                                                                                                                                                  | McGaughey, 2009[82]<br>(11)                            | A sham or a different intensity of pulsed electromagnetic therapy. No pulsed electromagnetic therapy or other treatments.                                             | For venous ulcers, there is strong evidence that pulsed electromagnetic therapy is more effective than sham pulsed electromagnetic therapy. For pressure and plantar ulcers, there is moderate evidence that pulsed electromagnetic therapy, in combination with | Positive      |

|                                                                                                                                                                                                                                                                |                                                      |                                                                                    |                                                                                                                                                                                                                                  |                |
|----------------------------------------------------------------------------------------------------------------------------------------------------------------------------------------------------------------------------------------------------------------|------------------------------------------------------|------------------------------------------------------------------------------------|----------------------------------------------------------------------------------------------------------------------------------------------------------------------------------------------------------------------------------|----------------|
|                                                                                                                                                                                                                                                                |                                                      |                                                                                    | conventional wound care is better than conventional wound care alone.                                                                                                                                                            |                |
| Honey (topical)                                                                                                                                                                                                                                                | Mwipatayi, 2004[101] (2)                             | Phenytoin, topical, commercial wound dressings or systemic and topical antibiotics | Inconclusive due to trials differences.                                                                                                                                                                                          | Indeterminate  |
| Ketanserin ointment, 2% (topical)                                                                                                                                                                                                                              | Nelson, 2009[84] (CR: Nelson, 2006[122]) (1)         | Vehicle (polyethylene glycol)                                                      | The trial was too small and for too short a follow-up period to be able to determine any difference in healing rates                                                                                                             | Indeterminate* |
| Primary nursing delivery, team members received training in leg ulcer management; standardized treatment from a wound care team comprising trained community pharmacists and nurses - a standardized protocol along with training was provided to team members | Ministry of Health and Long-term Care, 2009b[83] (2) | Usual care (no wound treatment protocol was used)                                  | The evidence supports that managing chronic wounds with a multidisciplinary wound care team significantly increases wound healing                                                                                                | Positive       |
| Silver releasing dressing                                                                                                                                                                                                                                      | Vermeulen, 2010[80] (3)                              | Dressing with silver, different dosages, no silver, other antiseptics              | The data from these trials show that silver-containing foam dressings did not significantly increase complete ulcer healing as compared with standard foam dressings or best local practice after up to four weeks of follow-up. | Neutral*       |
| <b><i>Diabetes foot/leg ulcers – wound area/size reduction (2 reviews)</i></b>                                                                                                                                                                                 |                                                      |                                                                                    |                                                                                                                                                                                                                                  |                |
| Hyperbaric oxygen therapy (systemic + usual care)                                                                                                                                                                                                              | Hunt, 2011[79] (CR: Hunt, 2009[120]) (1)             | Usual care                                                                         | Hyperbaric oxygen plus usual care may be no more effective at promoting ulcer healing.                                                                                                                                           | Neutral        |
| Stem cell therapy                                                                                                                                                                                                                                              | Hinchliffe, 2008[88] (2)                             | Saline, conventional treatment                                                     | 2/2 studies positive for stem cell therapy vs placebo.                                                                                                                                                                           | Positive       |
| <b><i>Diabetes foot/leg ulcers – time to healing or rate of healing (3 reviews)</i></b>                                                                                                                                                                        |                                                      |                                                                                    |                                                                                                                                                                                                                                  |                |
| Human skin equivalent                                                                                                                                                                                                                                          | Hunt, 2011[79] (CR: Hunt, 2009[120]) (1)             | Saline-moistened gauze                                                             | Study positive for human skin equivalent vs saline-moistened gauze                                                                                                                                                               | Positive       |
| Human cultured dermis                                                                                                                                                                                                                                          | Hunt,                                                | Usual care                                                                         | Human cultured                                                                                                                                                                                                                   | Neutral        |



|                                                                                 |                                                      |                                                                                                                                                                                                       |                                                                                                                                                                                                                                                                                                                              |               |
|---------------------------------------------------------------------------------|------------------------------------------------------|-------------------------------------------------------------------------------------------------------------------------------------------------------------------------------------------------------|------------------------------------------------------------------------------------------------------------------------------------------------------------------------------------------------------------------------------------------------------------------------------------------------------------------------------|---------------|
|                                                                                 | 2011[79]<br>(CR: Hunt,<br>2009[120])<br>(1)          |                                                                                                                                                                                                       | dermis substitute plus<br>usual care is no more<br>effective at increasing<br>ulcer healing rates vs<br>usual care                                                                                                                                                                                                           |               |
| Laser therapy and<br>complex intervention                                       | Hinchliffe,<br>2008[88] (1)                          | NR                                                                                                                                                                                                    | Couldn't draw<br>conclusions from<br>study.                                                                                                                                                                                                                                                                                  | Indeterminate |
| Platelet derived growth<br>factors (topical)                                    | Hunt,<br>2011[79]<br>(CR: Hunt,<br>2009[120])<br>(6) | Placebo                                                                                                                                                                                               | 4/6 studies positive for<br>topical growth factors<br>vs placebo                                                                                                                                                                                                                                                             | Positive      |
| Pressure off-loading,<br>felted foam                                            | Hunt,<br>2011[79]<br>(CR: Hunt,<br>2009[120])<br>(1) | Pressure off-loading<br>(pressure-relief half shoe)                                                                                                                                                   | No significant<br>difference between<br>felted foam vs<br>pressure-relief half<br>shoe                                                                                                                                                                                                                                       | Neutral       |
| Pressure off-loading, total<br>contact or non-removable<br>cast                 | Hunt,<br>2011[79]<br>(CR: Hunt,<br>2009[120])<br>(1) | Traditional dressing changes                                                                                                                                                                          | Study positive for<br>pressure off-loading vs<br>traditional dressing<br>changes                                                                                                                                                                                                                                             | Positive      |
| Stem cell therapy                                                               | Hinchliffe,<br>2008[88] (1)                          | Saline                                                                                                                                                                                                | 1/1 study neutral (no<br>significant difference)<br>for stem cell vs saline.                                                                                                                                                                                                                                                 | Neutral       |
| Skin grafts                                                                     | Hinchliffe,<br>2008[88] (1)                          | Split thickness graft                                                                                                                                                                                 | 1/1 study neutral (not<br>significant) for skin<br>grafts vs controls.                                                                                                                                                                                                                                                       | Neutral       |
| Topical negative pressure                                                       | Ubbink,<br>2008a[95]<br>(7)                          | Hydrocolloid wound gel and<br>gauze dressings,<br>chlorophyllin copper<br>complex /Papain-urea<br>topical, saline gauze,<br>hydrogels, alginates,<br>compression bandages,<br>ringers soaked bandages | Topical negative<br>pressure does not<br>significantly increase<br>the healing rate of<br>chronic wounds<br>compared with<br>comparators.                                                                                                                                                                                    | Neutral*      |
| <b><i>Diabetes foot/leg ulcers – ulcer healing (10 reviews)</i></b>             |                                                      |                                                                                                                                                                                                       |                                                                                                                                                                                                                                                                                                                              |               |
| Alginate, foam, hydrogel,<br>hydrocolloid dressings                             | Mason,<br>1999[112]<br>(10)                          | Sterile gauze dressings,<br>other dressings                                                                                                                                                           | Inconclusive                                                                                                                                                                                                                                                                                                                 | Indeterminate |
| Alginate, hydrogel,<br>hydrocellulase, semi-<br>permeable membrane<br>dressings | Hinchliffe,<br>2008[88] (7)                          | Saline-moistened gauze,<br>wet/dry sterile gauze                                                                                                                                                      | 2/2 studies showed no<br>difference between<br>alginate vs saline-<br>moistened gauze. 1/3<br>studies were positive<br>for hydrogel vs saline-<br>moistened gauze. 1/1<br>study positive for<br>hydrocellulase vs<br>saline-moistened<br>gauze. 1/1 study<br>positive for semi-<br>permeable membrane<br>vs saline-moistened | Neutral       |

|                                                                                                                 |                                               |                                                              |                                                                                                                                                                                                                                                  |                |
|-----------------------------------------------------------------------------------------------------------------|-----------------------------------------------|--------------------------------------------------------------|--------------------------------------------------------------------------------------------------------------------------------------------------------------------------------------------------------------------------------------------------|----------------|
|                                                                                                                 |                                               |                                                              | gauze.                                                                                                                                                                                                                                           |                |
| Amoxicillin + clavulanic acid (oral), ofloxacin, imipenem/cilastatin, ampicillin/sulbactam (IV)                 | Mason, 1999[112] (4)                          | Placebo, other antibiotics                                   | Inconclusive                                                                                                                                                                                                                                     | Indeterminate  |
| Antibiotics, choice based on bone biopsy (IV, oral)                                                             | Peters, 2012[70] (1)                          | NR                                                           | Inconclusive                                                                                                                                                                                                                                     | Indeterminate  |
| Ayurvedic preparations (oral + topical)                                                                         | Nelson, 2006[98] (CR: O'Meara, 2000[124]) (1) | Standard care                                                | The majority of trials were underpowered and too dissimilar to be pooled. There was no strong evidence for recommending any particular antimicrobial agent for the prevention of amputation, resolution of infection or ulcer healing.           | Indeterminate* |
| Clindamycin, fluoroquinolone, rifampicin, amoxicillin/clavulanic acid (oral, topical) +/- surgical intervention | Lima, 2011[74] (8)                            | No controls; all observational studies                       | There is insufficient evidence to support early use of broad-spectrum antibiotics against methicillin-resistant <i>Staphylococcus aureus</i> to promote healing of diabetic ulcers, since antibiotic resistance may develop from such treatment. | Indeterminate* |
| Compression                                                                                                     | Hinchliffe, 2008[88] (1)                      | Placebo                                                      | 1/1 study positive for compression vs placebo                                                                                                                                                                                                    | Positive       |
| Cultured human dermis                                                                                           | Mason, 1999[112] (2)                          | Standard wound care, conventional care                       | Inconclusive                                                                                                                                                                                                                                     | Indeterminate  |
| Dressings + debridement (hydrogel)                                                                              | Hunt, 2011[79] (CR: Hunt, 2009[120]) (4)      | Other debridement techniques (hydrogel), standard wound care | 3/4 studies positive for hydrogel vs standard wound care. Indeterminate study between hydrogel purilon vs hydrogel intrasite.                                                                                                                    | Positive       |
| Early surgical intervention + antibiotics                                                                       | Peters, 2012[70] (2)                          | Systemic antibiotics                                         | Hard to draw any conclusions from these data                                                                                                                                                                                                     | Indeterminate  |
| Electrical stimulation                                                                                          | Hinchliffe, 2008[88] (2)                      | NR                                                           | 1/2 studies positive for electrical stimulation                                                                                                                                                                                                  | Neutral        |
| Endovascular or open bypass revascularization surgery of an ulcerated foot                                      | Hinchliffe, 2012[69] (49)                     | NR                                                           | There were insufficient data to recommend one method of revascularization over                                                                                                                                                                   | Indeterminate  |

|                                                                                                      |                                               |                                                                                                                                                     |                                                                                                                                                                                                                                        |                |
|------------------------------------------------------------------------------------------------------|-----------------------------------------------|-----------------------------------------------------------------------------------------------------------------------------------------------------|----------------------------------------------------------------------------------------------------------------------------------------------------------------------------------------------------------------------------------------|----------------|
|                                                                                                      |                                               |                                                                                                                                                     | another. Of the 49 studies cited in this review, 46 are case series and have no control group. Of the remaining three studies with a control group: no revascularization was noted.                                                    |                |
| Foot care clinic interventions                                                                       | Hunt, 2011[79] (CR: Hunt, 2009[120]) (1)      | Usual care                                                                                                                                          | Indeterminate                                                                                                                                                                                                                          | Indeterminate  |
| Granulocyte-colony stimulating factor (SC)                                                           | Mason, 1999[112] (1)                          | Placebo                                                                                                                                             | Initial result indicates that granulocyte-colony stimulating factor treatment should receive more extensive evaluation                                                                                                                 | Indeterminate  |
|                                                                                                      | Nelson, 2006[98] (CR: O'Meara, 2000[124]) (4) | Standard care, placebo                                                                                                                              | The majority of trials were underpowered and too dissimilar to be pooled. There was no strong evidence for recommending any particular antimicrobial agent for the prevention of amputation, resolution of infection or ulcer healing. | Indeterminate* |
|                                                                                                      | Peters, 2012[70] (5)                          | Usual care                                                                                                                                          | Results of these five studies are inconsistent and provide no clear evidence on which intervention is more effective                                                                                                                   | Indeterminate  |
| Growth factors (topical)                                                                             | Hinchliffe, 2008[88] (8)                      | Placebo, saline-moistened gauze                                                                                                                     | 4/8 studies positive for growth factors vs placebo                                                                                                                                                                                     | Neutral        |
| Hydrogel, cadexomer iodine ointment, dressings, larval therapy, sugar (topical) systemic antibiotics | Nelson, 2006[98] (CR: O'Meara, 2000[124]) (5) | Saline gauze, dry gauze, antibiotics, standard care, streptokinase, 2% eosin and 0.3% chloroxylenol spray, gauze and chlorhexidine, sugar dressings | The majority of trials were underpowered and too dissimilar to be pooled. There was no strong evidence for recommending any particular antimicrobial agent for the prevention of amputation, resolution of infection or ulcer healing. | Indeterminate* |
| Hyperbaric oxygen                                                                                    | Hinchliffe,                                   | Standard care                                                                                                                                       | 5/6 studies positive for                                                                                                                                                                                                               | Positive       |

|                                                                                                                                                                            |                                                |                                                                                                                           |                                                                                                                                                                                                                                                                                             |               |
|----------------------------------------------------------------------------------------------------------------------------------------------------------------------------|------------------------------------------------|---------------------------------------------------------------------------------------------------------------------------|---------------------------------------------------------------------------------------------------------------------------------------------------------------------------------------------------------------------------------------------------------------------------------------------|---------------|
| therapy                                                                                                                                                                    | 2008[88] (6)                                   |                                                                                                                           | hyperbaric oxygen therapy vs standard care.                                                                                                                                                                                                                                                 |               |
|                                                                                                                                                                            | Hunt, 2011[79] (CR: Hunt, 2009[120]) (2)       | Usual care                                                                                                                | 2/2 studies positive for hyperbaric oxygen therapy vs usual care.                                                                                                                                                                                                                           | Positive      |
|                                                                                                                                                                            | Mason, 1999[112] (2)                           | Clinical management, standard care                                                                                        | Studies show no significant differences between hyperbaric oxygen therapy and standard care, clinical management                                                                                                                                                                            | Neutral       |
|                                                                                                                                                                            | Peters, 2012[70] (1)                           | NR                                                                                                                        | Inconclusive                                                                                                                                                                                                                                                                                | Indeterminate |
| Hyperbaric oxygen therapy (systemic + usual care)                                                                                                                          | Hunt, 2011[79] (CR: Hunt, 2009[120]) (1)       | Usual care                                                                                                                | Hyperbaric oxygen plus usual care may be no more effective at promoting ulcer healing.                                                                                                                                                                                                      | Neutral       |
| Imipenem/cilastatin, cefazolin, Ampicillin/sulbactam, Linezolid, Piperacillin/tazobactam. Amoxicillin + clavulanic acid, clindamycin hydrochloride (oral), pexiganan cream | Nelson, 2006[98] (CR: O'Meara, 2000[124]) (13) | Piperacillin/clindamycin, ceftriaxone, ceftioxin, amoxicillin clavulanate, placebo, cephalexin, ofloxacin, standard care. | There was no strong evidence for recommending any particular antimicrobial agent for the prevention of amputation, resolution of infection or ulcer healing. Topical pexiganan cream may be as effective as oral antibiotic treatment with ofloxacin for the resolution of local infection. | Neutral*      |
| Ketanserin (oral, topical)                                                                                                                                                 | Mason, 1999[112] (2)                           | Placebo, saline                                                                                                           | Inconclusive                                                                                                                                                                                                                                                                                | Indeterminate |
| Larval therapy                                                                                                                                                             | Hinchliffe, 2008[88] (2)                       | NR                                                                                                                        | 2/2 studies positive for larval therapy                                                                                                                                                                                                                                                     | Positive      |
| Lyophilized collagen, platelets and derived products (topical)                                                                                                             | Hinchliffe, 2008[88] (4)                       | Hyaluronic acid-medicated gauze, saline, placebo                                                                          | 1/1 study positive for lyophilized collagen vs hyaluronic acid-medicated gauze. 3/4 studies positive for platelets and derived products.                                                                                                                                                    | Positive      |
| Magnet and normothermic therapy                                                                                                                                            | Hinchliffe, 2008[88] (3)                       | Saline                                                                                                                    | 2/2 no significant differences (neutral) for normothermic therapy. No significant differences between magnet therapy and control.                                                                                                                                                           | Neutral       |

|                                                         |                                          |                                                               |                                                                                                                                                                                                                                                   |               |
|---------------------------------------------------------|------------------------------------------|---------------------------------------------------------------|---------------------------------------------------------------------------------------------------------------------------------------------------------------------------------------------------------------------------------------------------|---------------|
| Patient education                                       | Hunt, 2011[79] (CR: Hunt, 2009[120]) (5) | Usual care                                                    | Indeterminate                                                                                                                                                                                                                                     | Indeterminate |
|                                                         | Mason, 1999[112] (1)                     | Usual care                                                    | The education intervention contains a “scare-tactic” component and it is unclear whether this approach is generalizable. Method merits evaluation in other contexts.                                                                              | Indeterminate |
| Percutaneous flexor tenotomy                            | Roukis, 2009[86] (2)                     | All are case series so there aren't any control groups        | Inconclusive due to poor methodologies of studies.                                                                                                                                                                                                | Indeterminate |
| Procaine + polyvinylpyrrolidone (IM)                    | Peters, 2012[70] (1)                     | NR                                                            | No significant difference between groups                                                                                                                                                                                                          | Neutral       |
| Resection of the chronic wound                          | Hinchliffe, 2008[88] (4)                 | Conservative or usual treatment                               | 2/4 studies positive for surgery vs conservative or usual treatment.                                                                                                                                                                              | Neutral       |
| Sharp debridement                                       | Hinchliffe, 2008[88] (1)                 | NR                                                            | The evidence of benefit of sharp debridement is not strong and is based on a single study comprising a subgroup analysis of cases from an RCT of another intervention. Healing at 12 weeks was more likely following a more vigorous debridement. | Indeterminate |
| Skin grafts                                             | Hinchliffe, 2008[88] (5)                 | Saline moistened gauze, conventional treatment, standard care | 4/5 studies positive for skin grafts vs standard care, saline moistened gauze, conventional treatment                                                                                                                                             | Positive      |
| Stem cell therapy                                       | Hinchliffe, 2008[88] (2)                 | Standard/conventional treatment                               | 2/2 positive for stem cell therapy vs standard/conventional treatment                                                                                                                                                                             | Positive      |
| Superoxidized water and soap, povidone iodine (topical) | Peters, 2012[70] (2)                     | Other topical disinfectants                                   | Inconclusive                                                                                                                                                                                                                                      | Indeterminate |
| Therapeutic footwear                                    | Hunt, 2011[79] (CR: Hunt, 2009[120]) (2) | Usual footwear                                                | Indeterminate                                                                                                                                                                                                                                     | Indeterminate |
| Thrombin-induced                                        | Mason,                                   | Placebo                                                       | These findings need                                                                                                                                                                                                                               | Indeterminate |

|                                                                                                                                                                               |                          |                                                                                                                      |                                                                                                                                                                                                                                              |               |
|-------------------------------------------------------------------------------------------------------------------------------------------------------------------------------|--------------------------|----------------------------------------------------------------------------------------------------------------------|----------------------------------------------------------------------------------------------------------------------------------------------------------------------------------------------------------------------------------------------|---------------|
| human platelet growth factor, recombinant platelet derived growth factor, recombinant basic fibroblast growth factor, arginine-glycine-aspartic acid peptide matrix (topical) | 1999[112] (6)            |                                                                                                                      | confirmation from further trials                                                                                                                                                                                                             |               |
| Topical negative pressure                                                                                                                                                     | Hinchliffe, 2008[88] (3) | Saline moistened gauze, standard care                                                                                | 3/3 studies positive for topical negative pressure vs saline moistened gauze, standard care.                                                                                                                                                 | Positive      |
| Negative pressure therapy                                                                                                                                                     | Noble-Bell, 2008[93] (4) | Dressings: alginates, hydrocolloids, foams or hydrogels, saline gauze, moist dressing                                | Negative pressure therapy is more effective than conventional dressings, but quality of the studies were weak.                                                                                                                               | Positive      |
|                                                                                                                                                                               | Xie, 2010[81] (10)       | Standard wound dressing, wet-to-dry dressings, advanced moist wound therapy and stand moist gauze dressing           | Consistent evidence of the benefit of negative pressure therapy compared with control treatments.                                                                                                                                            | Positive      |
| Total contact casting                                                                                                                                                         | Mason, 1999[112] (1)     | Standard treatment                                                                                                   | Preliminary finding from this one small trail suggests further investigation of this intervention is appropriate                                                                                                                             | Indeterminate |
| Ultrasound                                                                                                                                                                    | Hinchliffe, 2008[88] (1) | Sham therapy                                                                                                         | No significant differences for ultrasound vs sham                                                                                                                                                                                            | Neutral       |
| Zinc oxide tape                                                                                                                                                               | Hinchliffe, 2008[88] (1) | Hydrocolloid dressing                                                                                                | 1 study positive for zinc oxide vs hydrocolloid.                                                                                                                                                                                             | Positive      |
| <b><i>Pressure ulcers – wound area/size reduction (3 reviews)</i></b>                                                                                                         |                          |                                                                                                                      |                                                                                                                                                                                                                                              |               |
| Air-fluidised support                                                                                                                                                         | Reddy, 2011[78] (4)      | Standard care                                                                                                        | Compared with standard care, air-fluidised supports may be more effective than standard care (alternating-pressure mattresses, regular changes of position, sheepskin, gel pads, or limb protectors) at healing established pressure ulcers. | Positive      |
| Alternating pressure mattress, low-air-loss mattress, air-fluidised mattress                                                                                                  | Reddy, 2008[94] (8)      | Fluid mattress overlay, air and foam mattress, specialized foam mattress overlay, foam overlay, alternating pressure | No clear evidence favored one support surface over another.                                                                                                                                                                                  | Neutral       |

|                                                                                                                                                          |                         |                                                                                                                                                                                                                                          |                                                                                                                                                     |               |
|----------------------------------------------------------------------------------------------------------------------------------------------------------|-------------------------|------------------------------------------------------------------------------------------------------------------------------------------------------------------------------------------------------------------------------------------|-----------------------------------------------------------------------------------------------------------------------------------------------------|---------------|
|                                                                                                                                                          |                         | mattress, alternating pressure mattress covered with foam                                                                                                                                                                                |                                                                                                                                                     |               |
| Collagenase                                                                                                                                              | Reddy, 2011[78] (3)     | Other debridement agents                                                                                                                                                                                                                 | Unclear whether any one debriding agent is consistently more effective than the other debriding agents at healing pressure ulcers.                  | Indeterminate |
| Collagenase, hydrogel dressings                                                                                                                          | Reddy, 2008[94] (6)     | Pain-urea-chlorophyllin copper, fibrinolysin or deoxyribonuclease, hydrocolloid, moist saline gauze, dextranomer, sugar and egg white                                                                                                    | No other dressing was superior to alternatives. Little evidence supports the use of a specific support surface or dressing over other alternatives  | Neutral       |
| Electric current, electromagnetic therapy                                                                                                                | Reddy, 2008[94] (5)     | Placebo                                                                                                                                                                                                                                  | There is little evidence to support adjunctive therapies compared with standard care.                                                               | Neutral       |
| Foam, calcium alginate, radiant heat dressing, dextranomer powder dressings                                                                              | Reddy, 2008[94] (4)     | Foam with wound-contact layer, dextranomer, topical, alginate dressing, moist saline gauze                                                                                                                                               | No other dressing was superior to alternatives. Little evidence supports the use of a specific support surface or dressing over other alternatives. | Neutral       |
| Hydrocolloid dressings                                                                                                                                   | Heyneman, 2008[87] (29) | Saline gauze, foam dressing, hydrogels, less-contact layers, topical enzymes, povidine gauze, pheytoin, biosynthetics, radiant heat therapy (wound wrapped in polyurethane film), sequential use of hydrocolloids and alginates dressing | Hydrocolloids are more effective than gauze dressings for the reduction of the wound dimensions.                                                    | Positive      |
| Hydrocolloid, hydrogel wafer, hydrogel, occlusive polyurethane, transparent moisture-permeable dressings                                                 | Reddy, 2008[94] (10)    | Hydrocolloid dressing, calcium alginate dressing, polyurethane foam dressing, dextranomer, moist saline gauze                                                                                                                            | No other dressing was superior to alternatives. Little evidence supports the use of a specific support surface or dressing over other alternatives. | Neutral       |
| Hydrogel, cadexomer iodine, semelil gel, radiant heat, zinc salt spray, aluminum hydroxide, vitamin A ointment, streptokinase-streptodornase, dialysate, | Reddy, 2008[94] (10)    | Povidone-iodine gauze, placebo spray and ointment, zinc oxide, standard care, moist saline gauze, saline                                                                                                                                 | No other dressing was superior to alternatives. Little evidence supports the use of a specific support surface or dressing over other               | Neutral       |

|                                                                                                                                                        |                     |                                                                                   |                                                                                                                                                                                                 |                |
|--------------------------------------------------------------------------------------------------------------------------------------------------------|---------------------|-----------------------------------------------------------------------------------|-------------------------------------------------------------------------------------------------------------------------------------------------------------------------------------------------|----------------|
| topical insulin, moist saline gauze and whirlpool, semelil dressings                                                                                   |                     |                                                                                   | alternatives.                                                                                                                                                                                   |                |
| Low level laser therapy, laser and standard care                                                                                                       | Reddy, 2008[94] (2) | Standard care, ultrasound and UV-C and standard care                              | There is little evidence to support adjunctive therapies compared with standard care.                                                                                                           | Neutral        |
| Polarized light, monochromatic light and cadexomer iodine or hydrocolloid                                                                              | Reddy, 2008[94] (2) | Standard care, cadexomer iodine or hydrocolloid                                   | There is little evidence to support adjunctive therapies compared with standard care.                                                                                                           | Neutral        |
| Ultrasound                                                                                                                                             | Reddy, 2008[94] (1) | Placebo ultrasound                                                                | There is little evidence to support adjunctive therapies compared with standard care.                                                                                                           | Neutral        |
| Vacuum therapy                                                                                                                                         | Reddy, 2008[94] (2) | Moist gauze, cadexomer iodine, topical, papain-urea-chlorophyllin copper, topical | There is little evidence to support adjunctive therapies compared with standard care.                                                                                                           | Neutral        |
| Vitamin C and ultrasound, consistent wound care and controlled nutritional support, vitamin C, zinc sulfate                                            | Reddy, 2008[94] (4) | Vitamin C and placebo ultrasound, standard care and standard diet, placebo        | Nutritional supplement studies showed mixed results.                                                                                                                                            | Neutral        |
| <b><i>Pressure ulcers - time to healing or rate of healing (3 reviews)</i></b>                                                                         |                     |                                                                                   |                                                                                                                                                                                                 |                |
| Ascorbic acid, high-protein diet, concentrated, fortified, collagen protein hydrolysate supplement, disease-specific nutrition treatment               | Reddy, 2011[78] (8) | Control (low dose or no supplements)                                              | Unclear whether nutritional supplements are more effective than control at increasing healing of pressure ulcers                                                                                | Indeterminate  |
| Amorphous hydrogel dressing derived from Aloe vera wound dressings                                                                                     | Dat, 2012[68] (1)   | Saline gauze dressing                                                             | No significant difference between interventions. The poor quality of the included trials indicates that the trial results must be viewed with extreme caution as they have a high risk of bias. | Indeterminate* |
| Electromagnetic therapy, low-intensity direct current, negative-polarity and positive-polarity electrotherapy, and alternating-polarity electrotherapy | Reddy, 2011[78] (7) | Sham, standard treatment                                                          | Unclear whether electrotherapy is more effective than sham electrotherapy or standard care at healing pressure ulcers as we found insufficient evidence.                                        | Indeterminate  |
| Hydrocolloid dressings                                                                                                                                 | Reddy, 2011[78] (1) | Gauze soaked in saline, hypochlorite, or povidone iodine                          | Unclear whether hydrocolloid dressings are more effective at healing pressure ulcers                                                                                                            | Indeterminate  |



|                                                    |                     |                                                                                |                                                                                                                                                                                                            |               |
|----------------------------------------------------|---------------------|--------------------------------------------------------------------------------|------------------------------------------------------------------------------------------------------------------------------------------------------------------------------------------------------------|---------------|
|                                                    |                     |                                                                                | vs gauze soaked in saline, hypochlorite or povidone iodine.                                                                                                                                                |               |
| Low-air-loss beds                                  | Reddy, 2011[78] (5) | Standard beds, standard care                                                   | Compared with standard beds or standard care, we don't know whether low-air-loss beds are more effective at increasing pressure ulcer healing.                                                             | Indeterminate |
| Low level laser therapy                            | Reddy, 2011[78] (2) | Sham treatment, standard care                                                  | Unclear whether laser treatment is more effective than standard care at increasing pressure ulcer healing.                                                                                                 | Indeterminate |
| Low-tech constant-low-pressure supports            | Reddy, 2011[78] (1) | Other low-tech constant-low-pressure supports                                  | Unclear whether a layered-foam replacement mattress is more effective than a water mattress at increasing healing of pressure ulcers.                                                                      | Indeterminate |
| Phenytoin ointment (topical)                       | Reddy, 2011[78] (4) | Hydrocolloid/standard dressings or antibiotic ointment                         | Unclear whether topical phenytoin ointment is more effective at increasing pressure ulcer healing vs hydrocolloid/standard dressings or antibiotic ointment.                                               | Indeterminate |
| Seat cushions                                      | Reddy, 2011[78] (3) | Seat cushions, standard care                                                   | Unclear whether seat cushions are more effective than standard care at reducing time to complete healing, or whether different seat cushions differ in effectiveness at increasing pressure ulcer healing. | Indeterminate |
| Topical negative pressure                          | Reddy, 2011[78] (2) | Control (gauze soaked in Ringer's solution or a regimen of three gel products) | Unclear whether topical negative pressure is more effective than gauze soaked in Ringer's solution or a regimen of three gel products at increasing healing of pressure ulcers.                            | Indeterminate |
| Triple antibiotic ointment, active cream dressings | Reddy, 2008[94] (2) | Placebo, hydrocolloid, phenytoin suspension                                    | Little evidence supports the use of a specific support surface or dressing over other alternatives.                                                                                                        | Neutral       |

|                                                                                                                 |                                                   |                                                                                                                                                                                                                                                                                                                              |                                                                                                                                                                                                                     |                |
|-----------------------------------------------------------------------------------------------------------------|---------------------------------------------------|------------------------------------------------------------------------------------------------------------------------------------------------------------------------------------------------------------------------------------------------------------------------------------------------------------------------------|---------------------------------------------------------------------------------------------------------------------------------------------------------------------------------------------------------------------|----------------|
| Ultrasound                                                                                                      | Reddy, 2008[94] (1)                               | Placebo ultrasound                                                                                                                                                                                                                                                                                                           | There is little evidence to support adjunctive therapies compared with standard care.                                                                                                                               | Neutral        |
| <b><i>Pressure ulcers – ulcer healing (11 reviews)</i></b>                                                      |                                                   |                                                                                                                                                                                                                                                                                                                              |                                                                                                                                                                                                                     |                |
| Air-fluidised beds                                                                                              | Emergency Care Research Institute, 2001[106] (10) | Conventional therapies (including: alternating pressure pads, air support mattresses, water mattresses and high-density foam pads                                                                                                                                                                                            | Not conclusive, with none demonstrating statistically significant differences between Group 2 support surfaces and foam mattresses in complete ulcer healing.                                                       | Indeterminate* |
| Air-fluidised beds, air suspension beds, foam replacement mattress                                              | McInnes, 2011[76] (18)                            | Conventional treatment, 2-hourly turns, heel and elbow protectors, alternating-pressure mattresses, low-air-loss mattress, wheelchair seat cushion, foam mattress overlay, flat-based bed with a pressure relieving/redistributing mattress/cushion, convoluted foam mattress overlay, standard care, fluid overlay mattress | There is no conclusive evidence about the superiority of any support surface for the treatment of existing pressure ulcers.                                                                                         | Neutral*       |
| Alternating pressure surfaces                                                                                   | Reddy, 2011[78] (5)                               | Standard care, other care                                                                                                                                                                                                                                                                                                    | Unclear whether alternating-pressure surfaces are more effective than standard care at healing pressure ulcers, or whether any one alternating-pressure surface is consistently more effective than all the others. | Indeterminate  |
| Alternating pressure surfaces (alternating pressure mattress + pressure relief cushion)                         | McGinnis, 2011[75] (1)                            | Pegasus Cairwave alternating mattress replacement (1 in 3 alternating cycle) and Proactive cushion                                                                                                                                                                                                                           | Indeterminate                                                                                                                                                                                                       | Indeterminate* |
| Ascorbic acid, zinc sulphate                                                                                    | Langer, 2008[90] (4)                              | 10 mg ascorbic acid , high protein, placebo                                                                                                                                                                                                                                                                                  | It was not possible to draw any firm conclusions on the effect of enteral and parenteral nutrition on the prevention and treatment of pressure ulcers.                                                              | Indeterminate* |
| Collagen protein, standard hospital diet and high protein, standard hospital diet and high protein and zinc and | Reddy, 2008[94] (3)                               | Placebo, standard hospital diet, standard hospital diet + high protein + zinc + arginine + vitamin C + antioxidants                                                                                                                                                                                                          | Nutritional supplement studies showed mixed results.                                                                                                                                                                | Neutral        |

|                                                                                                                                                                                                                             |                                                 |                                                                                                                                                                 |                                                                                                                                                                                                         |          |
|-----------------------------------------------------------------------------------------------------------------------------------------------------------------------------------------------------------------------------|-------------------------------------------------|-----------------------------------------------------------------------------------------------------------------------------------------------------------------|---------------------------------------------------------------------------------------------------------------------------------------------------------------------------------------------------------|----------|
| arginine and vitamin C                                                                                                                                                                                                      |                                                 |                                                                                                                                                                 |                                                                                                                                                                                                         |          |
| Collagenase (topical)                                                                                                                                                                                                       | Ramundo, 2009[85] (CR: Ramundo, 2008[123]) (12) | Placebo, hydrogel, silver sulfadiazine, autolysis, papin-urea ointment, trypsin, fibrinolysin/DNAse ointment                                                    | Collagenase ointment is a safe and effective choice for debridement of cutaneous ulcers.                                                                                                                | Positive |
| Fibroblast-derived dermal replacement                                                                                                                                                                                       | Reddy, 2008[94] (1)                             | Standard care                                                                                                                                                   | Study positive for skin substitute vs standard care. However, the incremental benefit of this biological agent over less expensive standard wound care remains uncertain.                               | Positive |
| Hydrocolloid, polyurtheate, dextranomer, hydrogel, polyhydroxyethyl metahcrylate, amino acid copolymer dressings                                                                                                            | Bouza, 2005a[99] (21)                           | Other advanced dressings, conventional dressings (Saline gauze, Gauze Dakin's solution, Poridone-iodine guaze, Paraffin guaze, Collagen, Hydrocolloid Alginate) | Comparisons showed greater efficacy of hydrocolloid dressings but failed to confirm advantages of other advanced dressings compared with conventional ones                                              | Neutral  |
| Low-air-loss mattress, alternating pressure mattress, air-fluidised mattress                                                                                                                                                | Reddy, 2008[94] (1)                             | Specialized foam mattress overlay, alternating pressure mattress                                                                                                | No clear evidence favored one support surface over another.                                                                                                                                             | Neutral  |
| Phenytoin solution, antibiotics dressings                                                                                                                                                                                   | Reddy, 2008[94] (2)                             | Antibiotic ointment, honey dressing                                                                                                                             | Little evidence supports the use of a specific support surface or dressing over other alternatives                                                                                                      | Neutral  |
| Protease-modulating matrix, recombinant platelet-derived growth factor BB, nerve growth factor, transforming growth factor beta, granulocyte-macrophage/colony stimulating factor, basic fibroblast growth factor (topical) | Reddy, 2008[94] (9)                             | Petrolatum-soaked gauze, placebo                                                                                                                                | Several trials reported benefits with different topical growth factors. However, the incremental benefit of these biological agents over less expensive standard wound care remains uncertain.          | Positive |
| Saline spray containing aloe vera, silver chloride and decyl glucoside, saline, whirlpool                                                                                                                                   | Moore, 2008[92] (3)                             | No wound cleansing, or different wound cleansing solutions, or different cleansing techniques (Isotonic saline solution, tap water, no whirlpool)               | No statistically significant change in healing was seen when water was compared with saline. No statistically significant change in healing was seen for ulcers cleansed with, or without, a whirlpool. | Neutral  |
| Topical negative pressure                                                                                                                                                                                                   | van den Boogaard,                               | Cadexomer-iodine impregnated dressing, papin-                                                                                                                   | TNP has not proven to be more effective than                                                                                                                                                            | Neutral  |

|                                                                                       |                      |                                                                                                                                                 |                                                                                                                                                                                                                                                                                                                                                                                                                                                                                                                                                                                                                                                                                                                           |         |
|---------------------------------------------------------------------------------------|----------------------|-------------------------------------------------------------------------------------------------------------------------------------------------|---------------------------------------------------------------------------------------------------------------------------------------------------------------------------------------------------------------------------------------------------------------------------------------------------------------------------------------------------------------------------------------------------------------------------------------------------------------------------------------------------------------------------------------------------------------------------------------------------------------------------------------------------------------------------------------------------------------------------|---------|
|                                                                                       | 2008[97] (5)         | urea ointment, hydrocolloid, alginate, acetic acid, sodium hypochlorite, gauzes wetted in a saline solution or Ringer's solution, nitrofurazone | various control interventions.                                                                                                                                                                                                                                                                                                                                                                                                                                                                                                                                                                                                                                                                                            |         |
| Topical negative pressure (vacuum assisted wound closure)                             | Pham, 2003[104] (17) | Moist gauze, healthpoint system, opposite dressing, standard pressure, bolster dressing, conventional dressing                                  | For management of pressure sores and ulcers, no difference could be detected between vacuum assisted wound closure and use of traditional gauze dressings or the healthpoint system. Vacuum assisted wound closure therapy appeared to be more effective than Opsite and bolster dressings in skin graft management. Patients managed with vacuum assisted wound closure had increased rate of reepithelialisation and fewer patients required repeat split thickness skin graft to the same site. Vacuum assisted wound closure was more effective at treating various chronic and complex wounds than wet-to-moist gauze, as there was a significantly greater reduction in wound volume, depth and treatment duration. | Neutral |
| <b><i>Pressure ulcers - proportion of patients with healed wounds (2 reviews)</i></b> |                      |                                                                                                                                                 |                                                                                                                                                                                                                                                                                                                                                                                                                                                                                                                                                                                                                                                                                                                           |         |
| Collagenase, dressings                                                                | Reddy, 2008[94] (1)  | Hydrocolloid dressing                                                                                                                           | No other dressing was superior to alternatives. Little evidence supports the use of a specific support surface or dressing over other alternatives.                                                                                                                                                                                                                                                                                                                                                                                                                                                                                                                                                                       | Neutral |
| Electric current, electromagnetic therapy                                             | Reddy, 2008[94] (3)  | Placebo, Standard care                                                                                                                          | There is little evidence to support adjunctive therapies compared with standard care.                                                                                                                                                                                                                                                                                                                                                                                                                                                                                                                                                                                                                                     | Neutral |
| Hydrogel, hydrocolloid, hydrocolloid alginate, polyurethane foam                      | Reddy, 2008[94] (12) | Transparent absorbent acrylic dressing, hydrogel dressing, copolymer                                                                            | No other dressing was superior to alternatives. Little                                                                                                                                                                                                                                                                                                                                                                                                                                                                                                                                                                                                                                                                    | Neutral |

|                                                                                                                                      |                          |                                                                                                                         |                                                                                                                                                     |               |
|--------------------------------------------------------------------------------------------------------------------------------------|--------------------------|-------------------------------------------------------------------------------------------------------------------------|-----------------------------------------------------------------------------------------------------------------------------------------------------|---------------|
| dressings                                                                                                                            |                          | membrane, moist povidone-iodine gauze, moist saline gauze, collagen, change indicator, polyhema                         | evidence supports the use of a specific support surface or dressing over other alternatives.                                                        |               |
| Laser therapy + moist saline gauze                                                                                                   | Reddy, 2008[94] (1)      | Moist saline gauze                                                                                                      | There is little evidence to support adjunctive therapies compared with standard care.                                                               | Neutral       |
| Monochromatic phototherapy, UV light                                                                                                 | Reddy, 2008[94] (2)      | Placebo, placebo UV light                                                                                               | There is little evidence to support adjunctive therapies compared with standard care.                                                               | Neutral       |
| Oxyquinoline, radiant heat, soft silicone, hydrogel or foam, active ointment with live yeast derivative, topical insulin (dressings) | Reddy, 2008[94] (6)      | Lanolin, petrolatum, hydrocolloid or alginate dressing, hydropolymer dressing, transparent film, standard care, placebo | No other dressing was superior to alternatives. Little evidence supports the use of a specific support surface or dressing over other alternatives. | Neutral       |
| Resin salve absorbent dressings                                                                                                      | Reddy, 2008[94] (1)      | Sodium caroxymethylcellulose hydrocolloid polymer dressing                                                              | No other dressing was superior to alternatives. Little evidence supports the use of a specific support surface or dressing over other alternatives. | Neutral       |
| Specialized foam mattress, alternating pressure mattress                                                                             | Reddy, 2008[94] (3)      | Water mattress, alternating pressure overlay, alternating pressure mattress                                             | No clear evidence favored one support surface over another.                                                                                         | Neutral       |
| Ultrasound                                                                                                                           | Reddy, 2011[78] (2)      | Sham ultrasound                                                                                                         | Unclear whether therapeutic ultrasound is more effective than sham ultrasound at increasing the number of sores healed.                             | Indeterminate |
| <b><i>Mixed chronic wounds – ulcer healing (5 reviews)</i></b>                                                                       |                          |                                                                                                                         |                                                                                                                                                     |               |
| Adhesive zinc oxide tape                                                                                                             | Bradley, 1999a[111] (1)  | Hydrocolloid dressing                                                                                                   | Study positive for adhesive zinc oxide tape vs traditional treatment                                                                                | Positive*     |
| Dextranomer polysaccharide beads or paste, cadexomer iodine polysaccharide beads or paste                                            | Bradley, 1999a[111] (18) | Traditional/control treatment, other debriding agents                                                                   | 3/9 positive for dextranomer vs control. 2/9 positive for control vs dextranomer. 3/9 positive for cadexomer                                        | Neutral*      |
|                                                                                                                                      | Bradley, 1999a[111] (4)  | Other debriding agents: collagenase and streptokinase/streptodornase, hydrogel                                          | 1/3 studies positive for dextranomer polysaccharide vs hydrogel                                                                                     | Neutral*      |
|                                                                                                                                      | Bradley, 1999a[111]      | Dextranomer polysaccharide, Hydrogel                                                                                    | No studies showed statistically significant                                                                                                         | Neutral*      |

|                                                                                                                                                                                                                                |                         |                                                                                                                  |                                                                                                                                                                                                                                       |           |
|--------------------------------------------------------------------------------------------------------------------------------------------------------------------------------------------------------------------------------|-------------------------|------------------------------------------------------------------------------------------------------------------|---------------------------------------------------------------------------------------------------------------------------------------------------------------------------------------------------------------------------------------|-----------|
|                                                                                                                                                                                                                                | (2)                     |                                                                                                                  | effect between cadexomer vs comparators                                                                                                                                                                                               |           |
| Enzymatic agents (topical)                                                                                                                                                                                                     | Bradley, 1999a[111] (5) | Traditional or control treatment                                                                                 | No significant differences in studies                                                                                                                                                                                                 | Neutral*  |
|                                                                                                                                                                                                                                | Bradley, 1999a[111] (1) | Enzymatic agents                                                                                                 | No significant differences in studies                                                                                                                                                                                                 | Neutral*  |
| Hydrogels dressings                                                                                                                                                                                                            | Bradley, 1999a[111] (4) | Control or traditional treatment                                                                                 | 1/4 studies positive for hydrogels vs control or traditional treatment                                                                                                                                                                | Neutral*  |
|                                                                                                                                                                                                                                | Bradley, 1999a[111] (1) | Hydrogels                                                                                                        | No statistically significant difference between the two treatments                                                                                                                                                                    | Neutral*  |
| Hyperbaric oxygen therapy                                                                                                                                                                                                      | Wang, 2003[105] (57)    | Standard wound care                                                                                              | Hyperbaric oxygen therapy may be beneficial as an adjunctive therapy for chronic non healing diabetic wounds.                                                                                                                         | Positive  |
| No-sting barrier film bandages                                                                                                                                                                                                 | Schuren, 2005[100] (9)  | Conventional treatment, zinc oxide, petrolatum, hydrocolloid, placebo, no film                                   | Compared with no treatment or a placebo, liquid film-forming acrylate has a significant impact on the integrity of the peri-wound skin.                                                                                               | Positive  |
| Silver releasing dressing, non-releasing silver-activated charcoal dressing, hydrocolloid-silver-Vaseline impregnated dressing, silver coated dressing, hydrocolloid-silver releasing dressing, silver releasing-foam dressing | Lo, 2008[91] (14)       | Non-silver dressings including placebo (hydropolymer foam dressing, calcium alginate dressing, foam dressing)    | Silver-releasing dressings show positive effects on infected chronic wounds.                                                                                                                                                          | Positive* |
| Topical Negative Pressure (open-cell foam dressing with continuous suction)                                                                                                                                                    | Evans, 2001[107] (2)    | Normal wet-to-moist gauze dressings (with an occlusive dressing used to secure the gauze) changed 3 times daily. | Two small trials provide weak evidence to suggest that topical negative pressure may be superior to saline-gauze dressings in terms of wound healing. It was not possible to determine the optimum topical negative pressure regimen. | Positive* |
| <b><i>Infected surgical wounds – wound area/size reduction (2 reviews)</i></b>                                                                                                                                                 |                         |                                                                                                                  |                                                                                                                                                                                                                                       |           |
| Alginate dressings                                                                                                                                                                                                             | Lewis, 2001[108] (2)    | Traditional gauze dressing                                                                                       | There was no significant difference between any of the                                                                                                                                                                                | Neutral*  |

|                                                                                         |                                                                                |                                                          |                                                                                                                                                                                                                                                                                                    |                |
|-----------------------------------------------------------------------------------------|--------------------------------------------------------------------------------|----------------------------------------------------------|----------------------------------------------------------------------------------------------------------------------------------------------------------------------------------------------------------------------------------------------------------------------------------------------------|----------------|
|                                                                                         |                                                                                |                                                          | groups with regard to the reduction in wound area and volume.                                                                                                                                                                                                                                      |                |
| Foam dressings                                                                          | Vermeulen, 2012[71]<br>(CR: Vermeulen, 2005[113], Vermeulen, 2004[114])<br>(1) | Gauze and antiseptic agents                              | The difference in reduction in wound size at 4 weeks was not significantly different. There is no clear evidence of a difference between gauze and foam in terms of healing.                                                                                                                       | Neutral*       |
| <b><i>Infected surgical wounds – time to healing or rate of healing (5 reviews)</i></b> |                                                                                |                                                          |                                                                                                                                                                                                                                                                                                    |                |
| Alginate dressings                                                                      | Vermeulen, 2012[71]<br>(CR: Vermeulen, 2005[113], Vermeulen, 2004[114])<br>(2) | Gauze and sodium hypochlorite, gauze and povidone iodine | Only 2 small trials have compared alginate with gauze for surgical wounds healing rate.                                                                                                                                                                                                            | Indeterminate* |
| Aloe vera dermal gel (topical)                                                          | Dat, 2012[68] (1)                                                              | Standard care                                            | Inconclusive. The poor quality of the included trials indicates that the trial results must be viewed with extreme caution as they have a high risk of bias.                                                                                                                                       | Indeterminate* |
| Dextranomer polysaccharide beads dressings                                              | Lewis, 2001[108] (1)                                                           | Traditional gauze dressings + Eusol                      | No conclusions could be drawn from the results.                                                                                                                                                                                                                                                    | Indeterminate* |
|                                                                                         | Lewis, 2001[108] (1)                                                           | Silicone dressings                                       | There was no significant difference in the mean healing time for wounds treated with either dextranomer polysaccharide beads or silicone foam dressings.                                                                                                                                           | Neutral*       |
| Foam dressings                                                                          | Vermeulen, 2012[71]<br>(CR: Vermeulen, 2005[113], Vermeulen, 2004[114])<br>(5) | Gauze and antiseptic agents, moistened gauze             | None of the trials showed a statistically significant difference in time to healing between foam and gauze. All of these trials were small and we could not be confident that any of them had blinded assessment of outcomes. There is no clear evidence of a difference between gauze and foam in | Neutral*       |

|                                        |                                                                                |                                                  |                                                                                                                                                                                           |                |
|----------------------------------------|--------------------------------------------------------------------------------|--------------------------------------------------|-------------------------------------------------------------------------------------------------------------------------------------------------------------------------------------------|----------------|
|                                        |                                                                                |                                                  | terms of healing.                                                                                                                                                                         |                |
|                                        | Vermeulen, 2012[71]<br>(CR: Vermeulen, 2005[113], Vermeulen, 2004[114])<br>(1) | Dextranomer beads                                | There was no significant difference in time to complete healing. There is only 1 poor quality trial.                                                                                      | Neutral*       |
| Gauze + aloe vera dressings            | Vermeulen, 2012[71]<br>(CR: Vermeulen, 2005[113], Vermeulen, 2004[114])<br>(1) | Gauze                                            | Mean time to healing was reported as significantly greater with Aloe Vera compared with gauze, however the differential loss to follow up means that these results are not interpretable. | Indeterminate* |
| Honey (topical)                        | Moore, 2001[109]<br>(1)                                                        | Antiseptics and systemic antibiotics             | Study positive for honey vs other interventions. Confidence in a conclusion that honey is a useful treatment for superficial wounds or burns is low                                       | Positive       |
| Hydrocolloid dressings                 | Lewis, 2001[108]<br>(1)                                                        | Traditional gauze dressings with povidone iodine | There was no significant difference in median healing time between the hydrocolloid groups combined and the gauze treatment group                                                         | Neutral*       |
|                                        | Vermeulen, 2012[71]<br>(CR: Vermeulen, 2005[113], Vermeulen, 2004[114])<br>(1) | Gauze                                            | There was no difference in median time to healing between the groups.                                                                                                                     | Neutral*       |
| Plaster casting                        | Vermeulen, 2012[71]<br>(CR: Vermeulen, 2005[113], Vermeulen, 2004[114])<br>(1) | Elastic compression bandage                      | Lower limb amputation wounds healed significantly more quickly                                                                                                                            | Positive*      |
| Polyurethane foam and sheets dressings | Vermeulen, 2012[71]<br>(CR: Vermeulen, 2005[113],                              | Alginate and polyurethane sheets dressing        | There is insufficient evidence to inform on the relative effects of foam and alginate dressing on healing.                                                                                | Indeterminate* |



|                                                                                                                                                                                                                                   |                                                                          |                                                                                                                                                                                                                              |                                                                                                                                                                                                                                            |                |
|-----------------------------------------------------------------------------------------------------------------------------------------------------------------------------------------------------------------------------------|--------------------------------------------------------------------------|------------------------------------------------------------------------------------------------------------------------------------------------------------------------------------------------------------------------------|--------------------------------------------------------------------------------------------------------------------------------------------------------------------------------------------------------------------------------------------|----------------|
|                                                                                                                                                                                                                                   | Vermeulen, 2004[114]) (1)                                                |                                                                                                                                                                                                                              |                                                                                                                                                                                                                                            |                |
| Silicone elastomer foam dressings and polyurethane foam dressings                                                                                                                                                                 | Lewis, 2001[108] (5)                                                     | Traditional moist gauze                                                                                                                                                                                                      | No significant differences between interventions.                                                                                                                                                                                          | Neutral*       |
| Topical negative pressure                                                                                                                                                                                                         | Ubbink, 2008b[96] (13)                                                   | Hydrocolloids (gel, dressings), hydrogels, alginates (dressing), acetic acid, eusol, sodium hypochlorite gauze dressing, saline gauze, accuzyme, iodisorb, compression dressing, bolster dressing, gauze in ringers solution | In chronic and diabetic wounds, topical negative pressure did not allow earlier complete wound healing. It was, however, associated with a 1–10 day reduction in the time needed to prepare the wound for secondary closure surgery.       | Neutral*       |
| <b><i>Infected surgical wounds – ulcer healing (2 reviews)</i></b>                                                                                                                                                                |                                                                          |                                                                                                                                                                                                                              |                                                                                                                                                                                                                                            |                |
| Dextranomer polysaccharide beads dressings                                                                                                                                                                                        | Lewis, 2001[108] (1)                                                     | Traditional gauze dressings and Eusol                                                                                                                                                                                        | No conclusions could be drawn from the results.                                                                                                                                                                                            | Indeterminate* |
|                                                                                                                                                                                                                                   | Vermeulen, 2012[71] (CR: Vermeulen, 2005[113], Vermeulen, 2004[114]) (1) | Gauze and Eusol                                                                                                                                                                                                              | There was no significant difference between dextranomer and Eusol gauze in terms of number of wounds healing. There is insufficient evidence from one trial on the comparative effects of dextranomer bead dressing and Eusol soaked gauze | Indeterminate* |
| Polyurethane foam dressings                                                                                                                                                                                                       | Lewis, 2001[108] (2)                                                     | Alginate dressings, silicone dressings,                                                                                                                                                                                      | No conclusions could be drawn.                                                                                                                                                                                                             | Indeterminate* |
| <p>Note: IM = intramuscular, IV = intravenous, SC = subcutaneous, NR = not reported, RCT = randomized clinical trial, UV = ultraviolet.</p> <p>*These are high quality systematic reviews (AMSTAR score <math>\geq 8</math>).</p> |                                                                          |                                                                                                                                                                                                                              |                                                                                                                                                                                                                                            |                |
